# Supplementary material for: Rapid enhancement of chemical weathering recorded by extremely light seawater lithium isotopes at the Permian–Triassic boundary
Source: PubMed Central journal article supplement — Proc Natl Acad Sci U S A. 2018 Mar 26;115(15):3782–7. doi: 10.1073/pnas.1711862115 (PMC5899431; doi:10.1073/pnas.1711862115), 2018-03-26
Supplement: pnas.1711862115.sapp.pdf [file pnas.1711862115.sapp.pdf]

## Supplementary Information Appendix for

### **Rapid enhancement of chemical weathering recorded by extremely light seawater lithium isotopes at the Permian-Triassic boundary**

**He Sun<sup>a,b</sup>, Yilin Xiao<sup>a\*</sup>, Yongjun Gao<sup>c\*</sup>, Guijie Zhang<sup>a</sup>, John.F. Casey<sup>c</sup>, Yanan Shen<sup>a\*</sup>**

<sup>a</sup>CAS Key Laboratory of Crust-Mantle Materials and Environments, School of Earth and Space Sciences, University of Science and Technology of China, Hefei, 230026, China; <sup>b</sup>Hefei University of Technology, School of Resources and Environmental Engineering, Hefei, 230009, China; and <sup>c</sup>Department of Earth and Atmospheric Sciences, University of Houston, TX 77204-5007, USA.

\*Email: [ylxiao@ustc.edu.cn](mailto:ylxiao@ustc.edu.cn), [yongjungao@uh.edu](mailto:yongjungao@uh.edu), [yashen@ustc.edu.cn](mailto:yashen@ustc.edu.cn)

#### **Sections:**

##### **I. SI Text**

- Results
- Lithium isotope as a silicate weathering proxy
- Seawater Li isotope reconstruction
- Models

##### **II. SI Figures (S1-S19)**

##### **III. SI Tables (S1-S3)**

##### **IV. SI References**

## **I. SI Text**

### **Results**

The Li isotope measurements and element data of the Meishan section are shown in Tables S1 and S2. For trace element concentrations, we use the more commonly used term parts per million (ppm) to replace the unit of  $\mu\text{g/g}$  (1 ppm=1  $\mu\text{g/g}$ ).

### **Lithium isotope as a silicate weathering proxy**

Lithium is a water-soluble trace element, with  $^6\text{Li}$  enriched in secondary clay minerals formed during chemical weathering of silicate rocks, whereas  $^7\text{Li}$  partitions preferentially into the associated water (1, 2). Thus, chemical weathering of silicate rocks tends to drive modern-day riverine Li (isotope values that averages  $\delta^7\text{Li}_{\text{Riv}} \approx +23\text{‰}$  and ranges from +1.2 to +42‰) to be much heavier than its source rocks (upper continental crust averages  $\delta^7\text{Li}_{\text{Ucc}} \approx +1.7\text{‰}$ ) (3-5). However, lithium isotopes are not fractionated during primary silicate minerals dissolution (6). The riverine Li hence consists of two major inputs, one is dissolved load from silicate minerals dissolution (with low  $\delta^7\text{Li}$  and high [Li]) and the other related to secondary clay formation (with high  $\delta^7\text{Li}$  and low [Li]) (2, 3, 7). Congruent weathering, with little or no secondary clay formation, will result in dissolved Li isotope compositions similar to their source silicate bedrocks. On the other hand, incongruent weathering, with abundant secondary clays formation, will lead to heavy dissolved Li isotope signature relative to their source silicate bedrocks (2, 8, 9). Thus, the large Li isotopic variations observed in modern rivers (+1.2 to +42‰) is a function of chemical weathering intensity, which allows Li isotope ratios to be tracers of the extent of silicate weathering (9-11). Moreover, Li is almost solely hosted in silicate minerals, hence riverine Li signals can provide unique information about carbon dioxide consumption during weathering (11, 12).

The Li isotopic composition of seawater reflects the balance between Li input (river water from continental weathering, hydrothermal fluxes from mid-ocean ridge spreading centers, and subduction reflux), removal fluxes (the incorporation into low temperature clays in marine sediments and altered oceanic crust) and their respective isotopic compositions (9, 13). Present-day riverine Li flux ( $\sim 10 \times 10^9$  moles/year) is close to hydrothermal flux ( $\sim 13 \times 10^9$  moles/year). They are the two dominant sources of dissolved Li to seawater (9). HT vent fluid from high temperature

alteration of mid ocean ridge basalt ( $\delta^7\text{Li}_{\text{MORB}} \sim +4\%$ ) exhibit slightly fractionated but almost uniform  $\delta^7\text{Li}$  values ( $\sim +8\%$ ) (14, 15). Subduction reflux from slab dehydration and breakdown of marine clays has been argued to have an almost constant Li flux ( $\sim 6 \times 10^9$  moles/year) and a fixed isotopic composition of  $\sim +16\%$ , and thus would have a minor influence on marine Li isotope change (9). The flux-weighted isotopic composition of input Li (river + HT+ subduction reflux) for modern seawater is  $\sim +15\%$ . At steady state, the lithium removal flux should equal to the input flux. The isotopic fractionation during removal Li from seawater by secondary clays formation is a constant value ( $\Delta_{\text{SW-SED}} = \delta^7\text{Li}_{\text{SW}} - \delta^7\text{Li}_{\text{Sink}} \approx 16\%$ ) and drives seawater to be isotopically heavy (modern seawater  $\delta^7\text{Li} \sim +31\%$ ) (16-18). Marine carbonate formation, due to its low Li concentrations and small isotopic fractionation factor ( $\sim 3\text{-}5\%$ ), does not affect seawater Li significantly (11, 19, 20).

### **Seawater Li isotope reconstruction**

The sediment-related sinks for Li in the ocean exhibit relatively constant isotope fractionation during clay mineral ( $\Delta_{\text{SW-clay}} \sim 16\%$ ) and carbonate ( $\Delta_{\text{SW-carbonate}} \sim 3\text{-}5\%$ ) precipitation (16-22). Thus, marine sediments can be used to evaluate the Li isotopic compositions of seawater. Post-Archean Australian Shale (PAAS) normalized Rear Earth Element (REE) diagram of carbonate sediments from the Meishan profile show similar patterns to the marine authigenic carbonate (Fig. S1), indicating that the isotopic shifts of the sediments should represent primary seawater signatures with LREE depletion, positive La anomalies, negative Ce anomalies, and positive Y anomalies (23, 24). The  $\delta^7\text{Li}$  and [Li] values of measured sediment samples from the Meishan section show a large range of variation, with lower [Li] and relatively heavy  $\delta^7\text{Li}$  in Beds 22-24 and higher [Li] and relatively light  $\delta^7\text{Li}$  in Beds 25-34, which is consistent with lithostratigraphy (main text Fig.1b) (25). Clays typically have much higher Li ( $\sim 30\text{-}70$  ppm) and  $\text{Al}_2\text{O}_3$  ( $\sim 15\text{-}40$  wt.%) contents compared to carbonate ([Li]  $< 6$  ppm and  $\text{Al}_2\text{O}_3 < 2$  wt.%) (5, 16, 18, 21, 26-28). Hence the  $\text{Al}_2\text{O}_3\text{-[Li]}$  and  $\text{Al}_2\text{O}_3\text{-}\delta^7\text{Li}$  diagrams are used to estimate the carbonate and clay fractions of samples (Figs. S2-S3). The results show that the lower [Li] values in Beds 22-24 and higher [Li] values in Beds 26-30 are both strongly correlated with  $\text{Al}_2\text{O}_3$ , although with clearly different  $\text{Al}_2\text{O}_3\text{/[Li]}$  ratios. Bed 25, however, is deviated from the correlation lines because of high Kaolinite content. Samples from Beds 26-30 are clearly on the mixing line of clays and carbonates, with  $\text{Al}_2\text{O}_3\text{/[Li]} \sim 0.38$ . Previous

studies indicate that clays from Beds 26-30 are mainly composed of illite + montmorillonite with ~ 5% Kaolin, while Bed 25 has higher Kaolin content (~ 18%) (29). Because Kaolin have much higher Al<sub>2</sub>O<sub>3</sub> contents (up to 45 wt.%) than illite-montmorillonite (~ 15-30 wt.%), samples from Bed 25 show an upward shift to high Al<sub>2</sub>O<sub>3</sub> (30-32). The well-defined mixing line (Beds 26-30) intersects with the carbonate trend, constrained as a mixing line of limestone (carbonate + chert) end-members ([Li] ~ 12 ppm, Al<sub>2</sub>O<sub>3</sub> ~ 1.8 wt.%). The other end-member composition of clays, however, is difficult to 'precisely' quantify using the Al<sub>2</sub>O<sub>3</sub>-[Li] diagram. Linear Al<sub>2</sub>O<sub>3</sub>-[Li] correlation of samples from bed 22-24 display distinct lower slope (Al<sub>2</sub>O<sub>3</sub>/[Li] ~ 0.17) than mixing line with clays (Al<sub>2</sub>O<sub>3</sub>/[Li] ~ 0.38). Thus, despite good correlation of Al<sub>2</sub>O<sub>3</sub> and [Li], it is unlikely that clays participated in samples from Beds 22-24. Chert, with Al<sub>2</sub>O<sub>3</sub>/[Li] ~ 0.15 and [Li] ~ 20 ppm, is a more feasible mixing end member with carbonate samples in beds 22-24 (21, 27, 33-36). The mixing of chert is also supported by [Li]-Fe<sub>2</sub>O<sub>3</sub>, [Li]-B and Sr-Pb diagrams (Figs. S4-S6) (27, 28, 33, 37). These arguments strongly support the contention that chert, rather than clays, is responsible for the observed [Li]-Al<sub>2</sub>O<sub>3</sub> correlation in carbonates from Beds 22-24. Unfortunately, the Li isotopic fractionation factor of chert is poorly constrained. Thus,  $\delta^7\text{Li}-1/[\text{Li}]$ ,  $\delta^7\text{Li}-\text{CaO}$ , and  $\text{CaO}-1/[\text{Li}]$  diagrams are made to verify the isotopic effect on clays and chert mixing (Figs. S7-S10).

The remarkable correlations of  $\delta^7\text{Li}$  with  $1/[\text{Li}]$  and CaO in mudstone samples from Beds 26-34 (Figs. S7-S9), and the relative constant Li isotopic compositions of the claystone from Beds 26-34 ( $\delta^7\text{Li}=-0.1$  to  $-0.3\text{‰}$ ), argue for the two end-members of mixing (clays and carbonates) both have a relatively steady composition, which indicate that the seawater Li isotopic composition should remain stable during the time interval (~ 0.4 Ma). We use the measured Li isotopic compositions of claystone to represent the Li isotopic compositions of clay end-member, and use the  $1/[\text{Li}]-\text{CaO}$ ,  $1/[\text{Li}]-\delta^7\text{Li}$ , and  $\text{CaO}-\delta^7\text{Li}$  diagrams to calculate the [Li], CaO and Li isotopic compositions of the two end-members, with input parameters of  $[\text{Li}]_{\text{limestone}}=12$  ppm (independently derived from [Li]-Al<sub>2</sub>O<sub>3</sub> diagram) and  $\delta^7\text{Li}_{\text{clay}}=-0.2\text{‰}$  (measured Li isotopic compositions of claystone from Beds 26-34). Calculation based on mixing model gives [Li] = 45-50 ppm, CaO ~ 0 wt.% and  $\delta^7\text{Li}=-0.2\text{‰}$  for clays, and [Li] = 12 ppm, CaO = 35.5wt.% and  $\delta^7\text{Li} = +11.5\text{‰}$  for limestones. Thus, seawater Li isotope estimations from carbonates (~ +14.5-+16.5‰ at fractionation factor of ~ 3-5‰) and clays (~ +15.8‰ at fractionation factor of ~ 16‰) are in good agreement. Samples from Beds 22-24, however, show variation in  $\delta^7\text{Li}$  independent to Al<sub>2</sub>O<sub>3</sub> and  $1/[\text{Li}]$ . The poorly linear correlation

in Figure S10 demonstrates that, if [Li] increase from 1.5 ppm to ~ 20 ppm as a result of chert mixing, the  $\delta^7\text{Li}$  only changed ~ 0.6‰. This indicates that, although the fractionation factor is unclear, chert should have Li isotope composition similar to carbonate in the present study. Thus, without the mixing of clays, the carbonate samples (Beds 22-24) could represent primary seawater signatures by adding 3-5‰ fractionation (9, 11, 19, 20, 38). Bed 25, with high  $\text{Al}_2\text{O}_3$ , B and low Ti, Na, Fe, Co concentrations, reflecting its higher Kaolin proportion in clays (Figs. S2-S6) (30, 32). The high  $\text{Al}_2\text{O}_3$ , [Li] (29-39 ppm) and B (up to 117 ppm) concentrations and low  $\delta^7\text{Li}$  values (-0.3~1.0‰) imply clays dominate the Li signal in Bed 25. Therefore, the  $\delta^7\text{Li}$  values of clays in Bed 25 should be similar or slightly lower than whole rock samples, which gives estimated seawater  $\delta^7\text{Li}$  of ~ +16.0‰, similar to Beds 26-30. The calculated seawater Li isotope records and detailed calculation procedures are listed in Table S1.

## Models

The steady state box model of the Li cycle in marine system was first established by Misra and Froelich (2012). Here, similar static and dynamic box models were used to explore seawater Li isotope variations. Essentially, seawater Li budget is controlled by its input (river water, hydrothermal fluid, subduction refluxed) and output (clay formation during seafloor alteration and sediment diagenesis) fluxes (2, 9, 11, 15, 17, 39-44). Therefore, the mass balance of Li in seawater gives:

$$\frac{dN}{dt} = F_{input} - F_{output} = F_{Riv} + F_{HT} + F_{SR} - F_{SC} \quad (\text{Eqn.S1})$$

where N is the seawater Li reservoir. We use a total Li ~  $3.4 \times 10^{16}$  moles (inventory of Li in present-day seawater, calculated using a total volume of the oceans ~  $1.33 \times 10^9 \text{ km}^3$  and [Li] ~ 26  $\mu\text{M}$ ) as a start parameter (9).  $F_x$  represents the input and output fluxes (Riv=river, HT=hydrothermal fluid, SR=subduction reflux, SC=Li sink into clays), with start parameters equal to modern Li fluxes (Table S3). The Li isotopic balance in seawater can be presented by equation:

$$\frac{d\delta_{SW}}{dt} = \frac{1}{N} \{F_{Riv}(\delta_{Riv} - \delta_{SW}) + F_{HT}(\delta_{HT} - \delta_{SW}) + F_{SR}(\delta_{SR} - \delta_{SW}) - F_{SC}(\delta_{SC} - \delta_{SW})\} \quad (\text{Eqn.S2})$$

where  $\delta_{SW}$  is the seawater Li isotope composition and  $\delta_x$  in the right side of the equation represents the isotope ratio of input and output fluxes. Hence, the seawater Li isotopic change in a small time interval ( $\Delta t$ ) can be express as:

$$\Delta_{SW} = \frac{\Delta t}{N} \{F_{Riv}(\delta_{Riv} - \delta_{SW}) + F_{HT}(\delta_{HT} - \delta_{SW}) + F_{SR}(\delta_{SR} - \delta_{SW}) - F_{SC}(\delta_{SC} - \delta_{SW})\} \quad (\text{Eqn.S3})$$

where 10Kyr time steps were used in our study.

For the steady state model, the Li input and output flux balance with each other, with  $F_{input}=F_{output}$ . As suggest by previous studies, the subduction reflux has a minor influence on seawater Li isotope changes (9). This term is thus held constant at  $\sim 6 \times 10^9$  moles/year with isotopic composition of  $\sim +15\%$  (42). Therefore, variations in hydrothermal and/or riverine fluxes are the major forces that perturb seawater Li isotopes. The model results for several different assumptions are shown in Figs. S11-S14.

Figure S11 shows the isotopic response to decreasing riverine Li isotope compositions (due to a change in weathering intensity) with constant  $F_{Riv}$  and all other parameters for 5Myr. This result shows that, at steady state, riverine Li decrease from  $+20\%$  (incongruent weathering) to  $+2\%$  (congruent weathering) would only result in  $\sim 7\%$  Li isotopic decline for seawater. Such a process can drive seawater Li isotope down to a minimum of  $\sim +24\%$ . To explain the estimated light seawater  $\delta^7\text{Li}$  at PTB (as low as  $+10\%$ ), increased riverine Li fluxes (increase in weathering rate) with very low isotope value ( $+2\%$ , very high weathering intensity) are modeled (Fig. S12). The results show that, with increased  $F_{Riv}$ , seawater  $\delta^7\text{Li}$  decreased and exhibit shorter Li residence time. A fifteen-fold higher riverine flux can drive seawater  $\delta^7\text{Li}$  to  $\sim +19\%$ . However, continued increase in  $F_{Riv}$  cannot lower seawater  $\delta^7\text{Li}$  any further. Therefore, this is still not sufficient to cause the required seawater Li isotopic compositions.

Seawater isotopic responses to variation in  $F_{HT}$  are shown in Figure S13. Because the Li isotope compositions of HT vent fluids are controlled by their source rocks ( $\delta^7\text{Li}_{MORB} \sim 4\%$ ) with a constant fractionation factor ( $\sim 4\%$ ), the  $\delta^7\text{Li}_{HT}$  is kept constant at  $8\%$  in the modeling (14, 15, 18, 43, 45, 46). Increase in HT flux alone can change seawater  $\delta^7\text{Li}$  down to  $\sim +25\%$ , also not sufficient to cause the required seawater  $\delta^7\text{Li}$ . Figure S14 shows the effect of a combination of the two processes (change in river and HT flux) with light riverine  $\delta^7\text{Li}$ . Given that, at steady state, the Li sink from the oceans is equal to the input fluxes, a combination of the two processes can only result in seawater  $\delta^7\text{Li}$  decrease to  $\sim +18\%$ . Hence, for seawater  $\delta^7\text{Li}$  to decrease to observed values at PTB, a dynamic model is needed.

In the dynamic box model, Li sink into clays is a function of the rate of clay formation, seawater Li

concentration and Li partition coefficient of clays. We assume the rate of clay formation and Li partition coefficient to be constant because the process forming clays seems not changed over time. Thus, the seawater Li output is proportional to Li concentrations in seawater, forming a feedback on Li input:

$$F_{SC}^t = kN^t = k \left( N^{t_0} + \int_{t_0}^t F_{input} - \int_{t_0}^t F_{SC} \right) \quad (\text{Eqn.S4})$$

where  $k$  is the partition coefficient between seawater and clays. For a small time interval,  $\Delta t = t - t_0$ , the above formula can be rewrite as:

$$F_{SC}^t = \left\{ 1 + \frac{\Delta t}{N^{t_0}} (F_{input}^{t_0} - F_{SC}^{t_0}) \right\} \times F_{SC}^{t_0} \quad (\text{Eqn.S5})$$

Results of dynamic box model are shown in Figs. S15-S17.

Figure S15 shows the seawater Li isotopic response on  $F_{HT}$  changes using the dynamic box model. Changing HT flux from 0.5 to  $20 \times 10^{10}$  moles/year (modern  $F_{HT}$  is  $\sim 1.3 \times 10^{10}$  moles/year) (15), the seawater  $\delta^7\text{Li}$  minimum varies from +31 to +15‰. A higher HT flux ( $> 20 \times 10^{10}$  moles/year) could result in low  $\delta^7\text{Li}$  values to  $\sim +10\%$ , consistent with the seawater Li isotope ratios at PTB. However, such a high hydrothermal input at PTB seems unrealistic, since there is little geophysical evidence for very fast spreading rates or large ridge volume at end-Permian when global eustatic sea levels are thought to be low (47). The extremely low sea level at the end-Permian and the existence of supercontinent Pangea (320-185Myr) imply the ridge volume was probably less than today (48, 49). Seawater Sr isotope records show increased  $^{87}\text{Sr}/^{86}\text{Sr}$  at the end-Permian, either reflecting higher riverine Sr input or restrained hydrothermal flux (see Fig. S18) (12, 50-53). Therefore, the hydrothermal flux at the end-Permian should be less than or similar to today. Changing riverine Li and its isotope compositions also can account for the observed seawater  $\delta^7\text{Li}$  values (Fig. S16). Increasing the river flux alone for 5 Myr with modern riverine Li isotope values (+23‰) would result in a first decrease, and then ascending  $\delta^7\text{Li}$  trends for seawater. Decreasing the river  $\delta^7\text{Li}$ , with river flux stayed constant, would result in seawater  $\delta^7\text{Li}$  trends similar to Figure S11. Neither process alone has sufficient effect to perturb seawater  $\delta^7\text{Li}$  to the values observed in the Meishan section. Thus, modeling the observed low  $\delta^7\text{Li}$  requires an enhanced riverine Li flux accompanied with very light isotope ratios (Fig. S17). The results indicate that, if the river  $\delta^7\text{Li}$  set at  $\sim +4\%$ , the Li flux would have to increase  $\sim 15\text{-}20\times$  to cause the observed seawater  $\delta^7\text{Li}$  (+10-+16‰). Hence, the modeling suggests a process with enhanced weathering rate, which we suggest is the only realistic

approach for explaining the Li isotope variations in seawater at PTB. As discussed in the main text, the onset of PTB was in coincidence with the largest igneous-province (LIP) formation on the Earth, the Siberian Traps (54). The eruption of Siberian Traps has exposed enormous flood basalts ( $\sim 7 \times 10^6$  km<sup>2</sup>) to the Earth's surface. Because the weathering rates of minerals decrease with the Bowen reaction sequence (Fig. S19), basalts, mainly composed of pyroxene + plagioclase + olivine + glass, would be weathered very rapidly and highly congruent (few secondary minerals precipitated due to their freshness and aluminum-deficient nature). This combined with hothouse climate and acid rains, may provide favorable conditions for the enhanced weathering rate (55-60).



## II. SI Figures S1-S19:

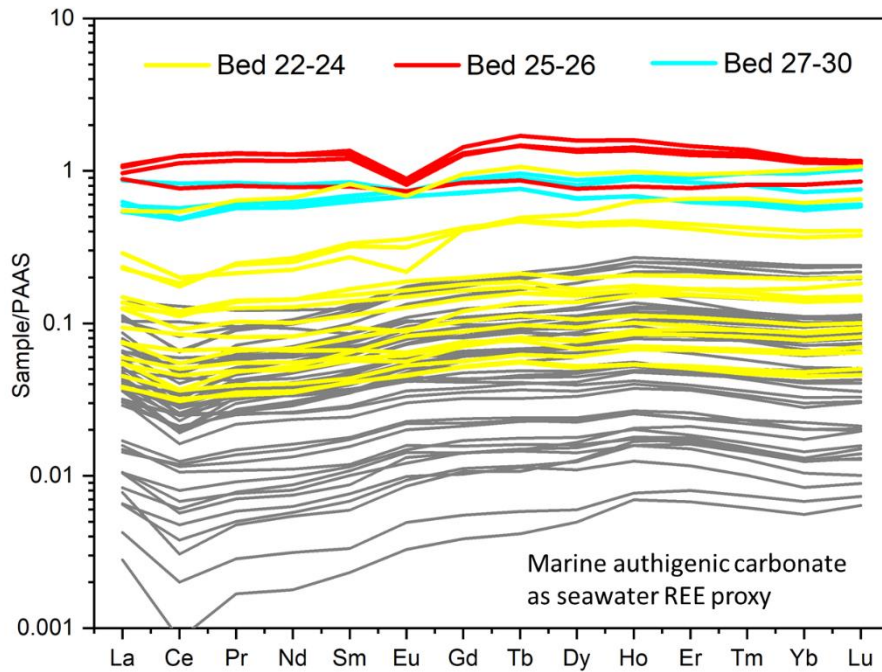

**Figure S1.** Post-Archean Australian Shale (PAAS) normalized REE patterns of samples from Meishan section and marine authigenic carbonate. The limestones from Beds 22-24 show similar LREE light patterns, positive La anomalies, negative Ce anomalies and low REE concentrations to the marine authigenic carbonate. Claystones from Beds 25-30 show flatter REE patterns but with significantly higher REE concentrations than limestones from Beds 22-24, which is a clear signature of marine authigenic clay minerals in more argillaceous beds. PAAS data after ref 23. Marine authigenic carbonate data from ref 24.

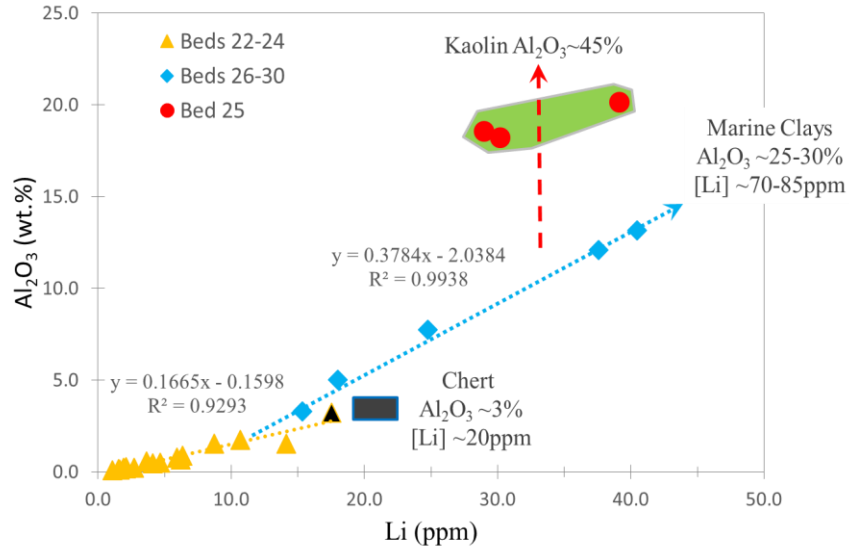

**Figure S2.**  $\text{Al}_2\text{O}_3$ -[Li] diagram of samples from Beds 22-30, Meishan section. Linear correlations of Beds 22-24 and Beds 26-30 represent mixing lines: mixing of carbonate and chert (yellow line); mixing of carbonate+chert and clays (blue line). Bed 25, due to its higher Kaolin content, is deviated from the mixing line. The well-defined mixing line intersects with the carbonates + chert trend, constrains a limestone (carbonate+ chert) end-member ([Li]~12 ppm,  $\text{Al}_2\text{O}_3$ ~1.8wt.%). The average Li and Al concentrations of clays and chert in the Meishan section are consistent with the published values (5, 16, 18, 21, 27, 33-36).

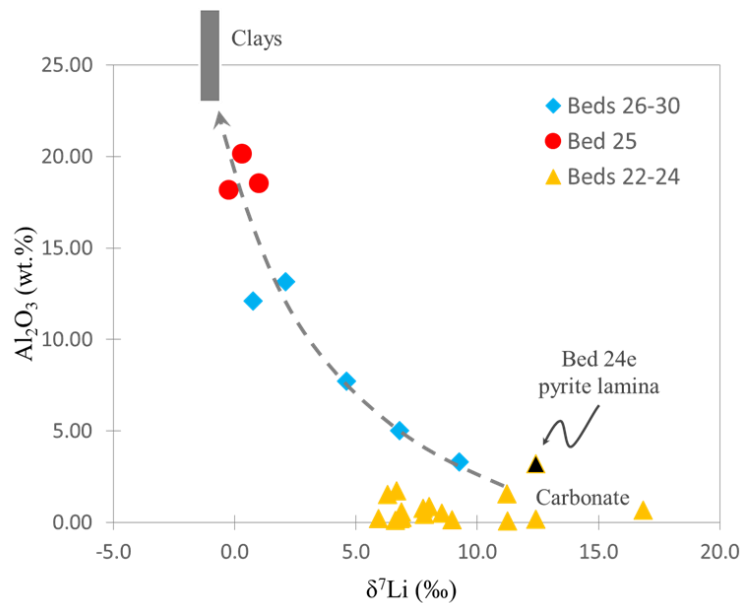

**Figure S3.** Lithium isotopic ratios and  $\text{Al}_2\text{O}_3$  variations of samples from Beds 22-30, Meishan section. Beds 25-30 all plot on the mixing trend of carbonates and clays. Beds 22-24, however, show variable  $\delta^7\text{Li}$  independent to  $\text{Al}_2\text{O}_3$  concentrations and suggest negligible contamination of clays in these samples.

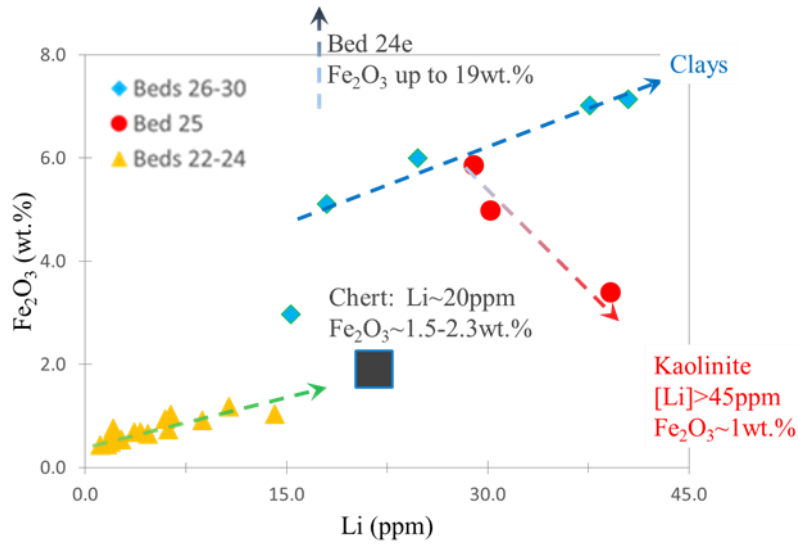

**Figure S4.**  $\text{Fe}_2\text{O}_3$  and  $[\text{Li}]$  variations of Meishan section. Linear correlations of Beds 22-24 (yellow triangle) and Beds 26-30 (blue diamond) represent mixing lines of carbonate with chert and limestone with clays. Bed 24e (red circle), with pyrite lamina, has very high  $\text{Fe}_2\text{O}_3$  content. Bed 25 has lower Fe concentrations, which could be a signature of Kaolinite (31, 32).

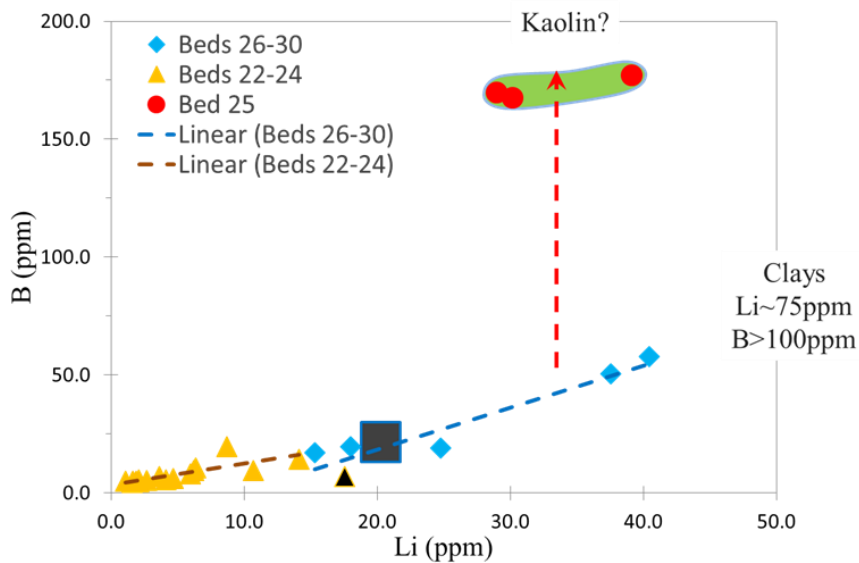

**Figure S5.** B and Li concentrations of Meishan section. Yellow line (Beds 22-24) and blue line (Beds 26-30) support the mixing trends as suggested by previous figures. Bed 25 has unusually high B concentrations ( $>150$  ppm), probably indicative of the role of Kaolinite.

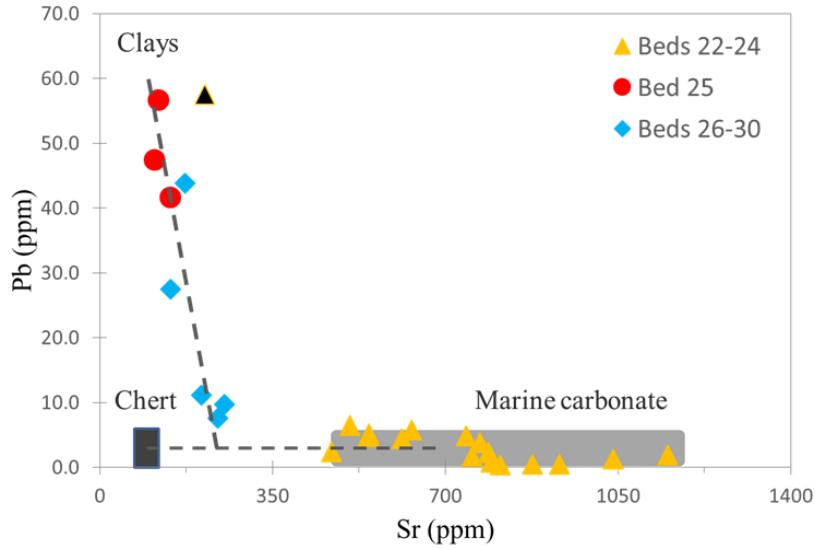

**Figure S6.** Pb-Sr diagram of Meishan section. Generally, carbonates (grey area) have high Sr low Pb concentrations, whereas clays have low Sr but high Pb concentrations (27, 28). Chert, with low Sr and Pb concentrations (27, 33), is needed to explain the trends of Beds 22-24 and Beds 25-30. The low Pb concentrations in Beds 22-24 indicate few clays are involved in these samples.

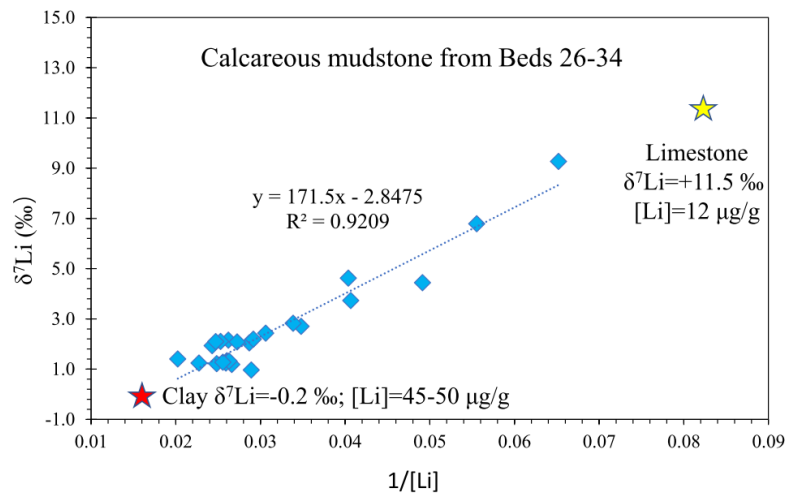

**Figure S7.** Li concentration ( $1/[\text{Li}]$ ) and isotopic composition of calcareous mudstones from Beds 26-34 of the Meishan section. The well defined mixing line indicates two steady end members: clays and limestones. Using the estimated Li concentrations, the Li isotopic compositions can be calculated, which give  $\delta^7\text{Li} \sim -0.2\text{‰}$  in clays and  $\delta^7\text{Li} \sim +11.5\text{‰}$  in limestones.

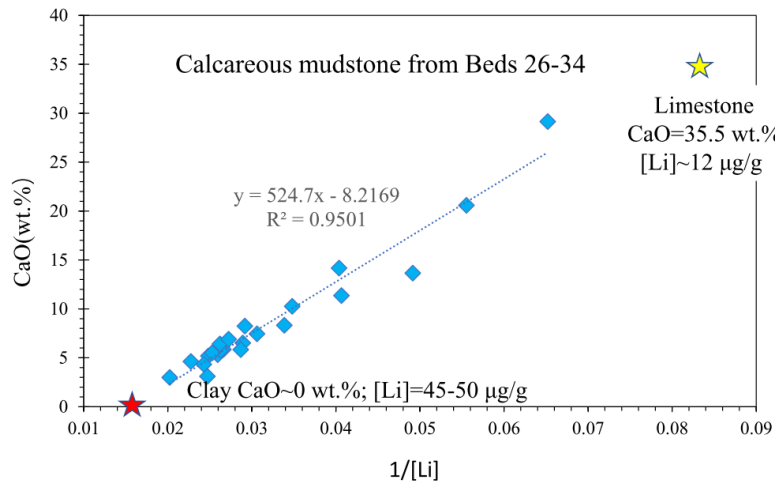

**Figure S8.** Li concentration ( $1/[Li]$ ) and CaO contents of calcarous mudstones from Beds 26-34 of the Meishan section. The well defined mixing line gives estimations of the two end members: CaO  $\sim$  0wt.% and  $[Li] = 45-50$  ppm in clays and CaO  $\sim$  35.5 wt.% and  $[Li]=12$  ppm in limestone.

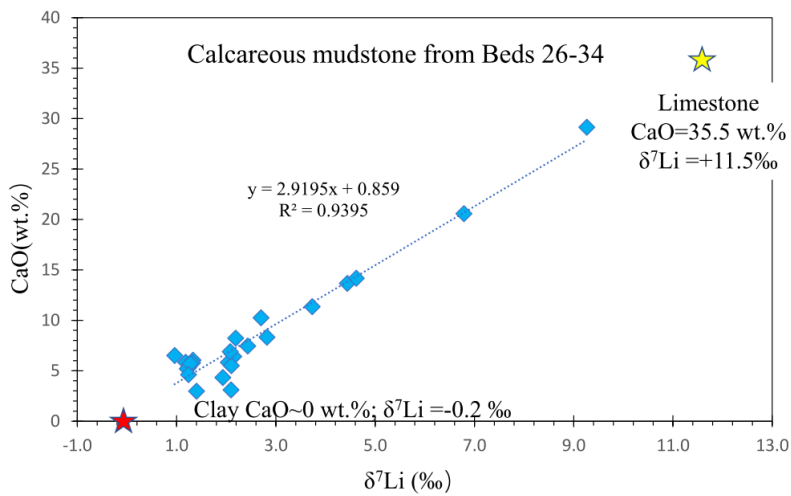

**Figure S9.** CaO contents vs.  $\delta^7Li$  diagram for calcarous mudstones from Beds 26-34 of the Meishan section. The correlation trend indicates mixing line of clays and limestones. Estimated end members are: CaO  $\sim$  0wt.%,  $\delta^7Li \sim -0.2$ ‰ in clays and CaO  $\sim$  35.5wt.%,  $\delta^7Li \sim +11.5$ ‰ in limestone.

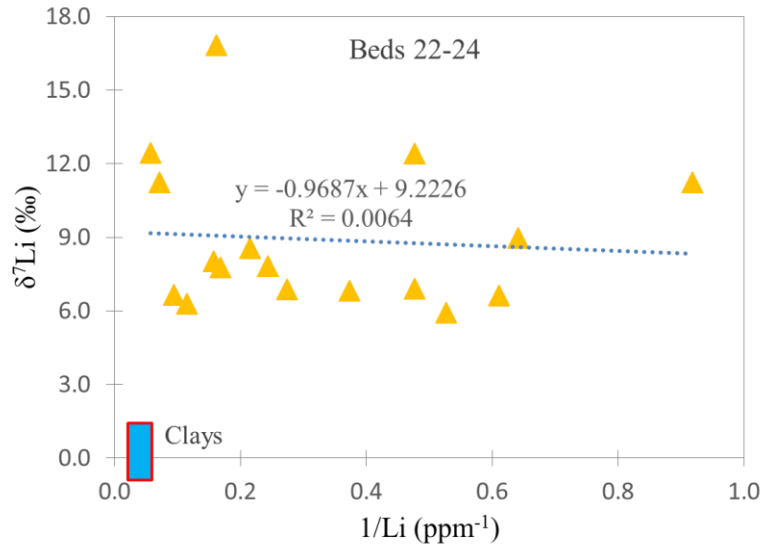

**Figure S10.** Li concentration and isotopic composition of Beds 22-24 from Meishan section. The poor linear correlation (blue dash line) rules out the contamination of clays. Samples with low Li concentrations have Li isotope compositions identical with the high [Li] ones. This indicates the chert should have Li isotope composition similar to carbonate in these samples.

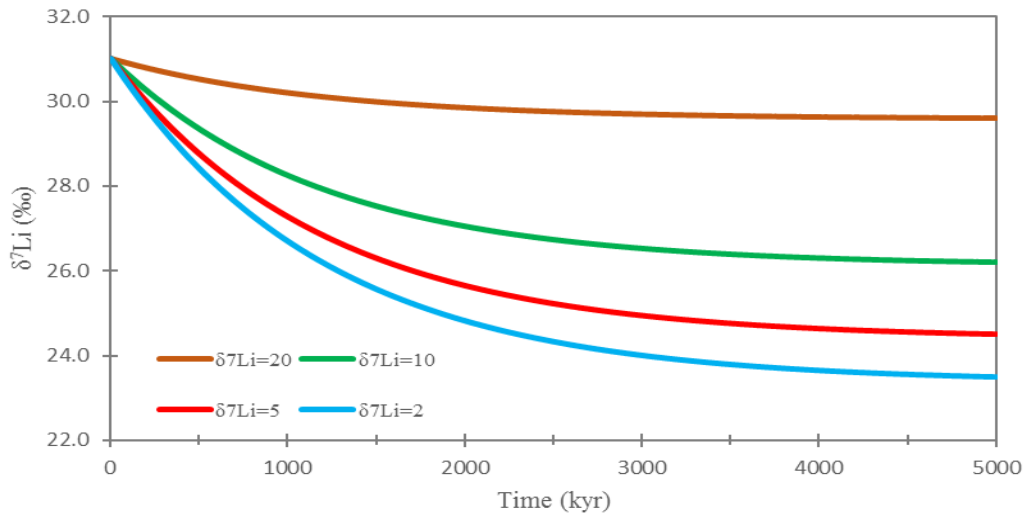

**Figure S11.** Seawater  $\delta^7\text{Li}$  response to lower riverine Li isotope values of +2, +5, +10, and +20‰ (based on starting value = current seawater composition of +31‰) over 5Myr . The steady state model is applied.

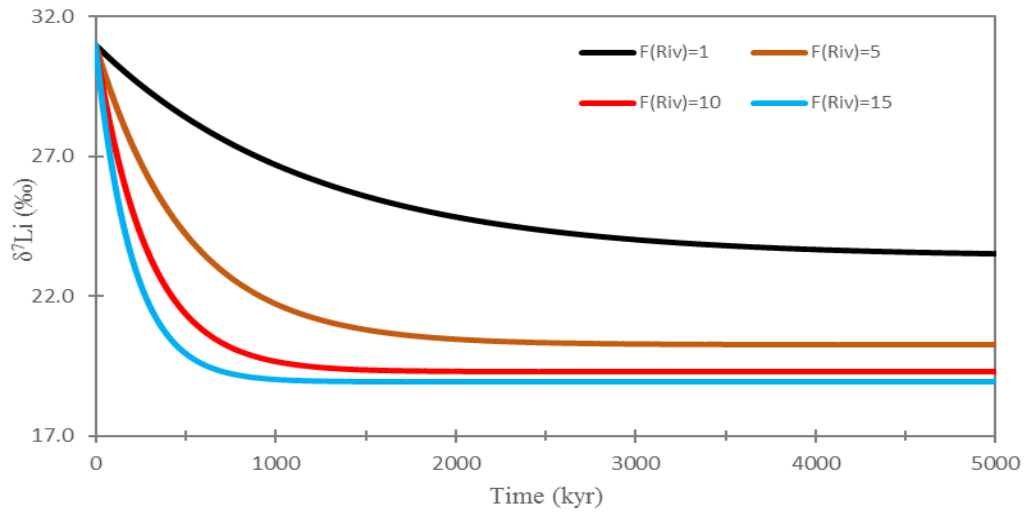

**Figure S12.** Seawater  $\delta^7\text{Li}$  response to increasing riverine [Li] flux of 1, 5, 10, and 15 times of present-day riverine [Li] flux with a riverine  $\delta^7\text{Li}$  value of +2‰ using a steady state model. Higher fluxes result in shorter times to achieve steady state.

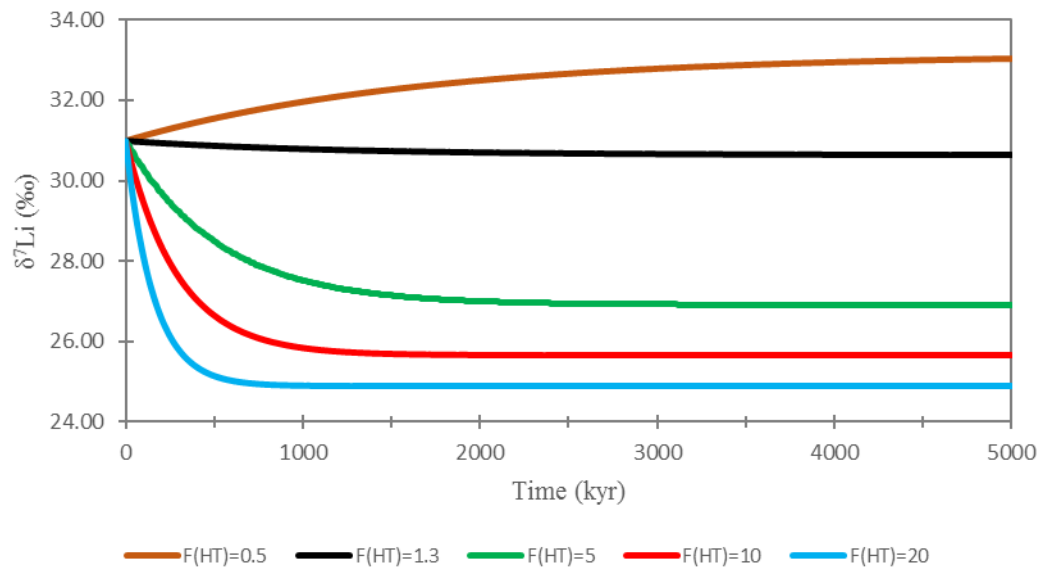

**Figure S13.** Effect of hydrothermal flux increase (from  $0.5 \times$  to  $20 \times 10^{10}$  mole/year) for 5 Myr, steady state model.

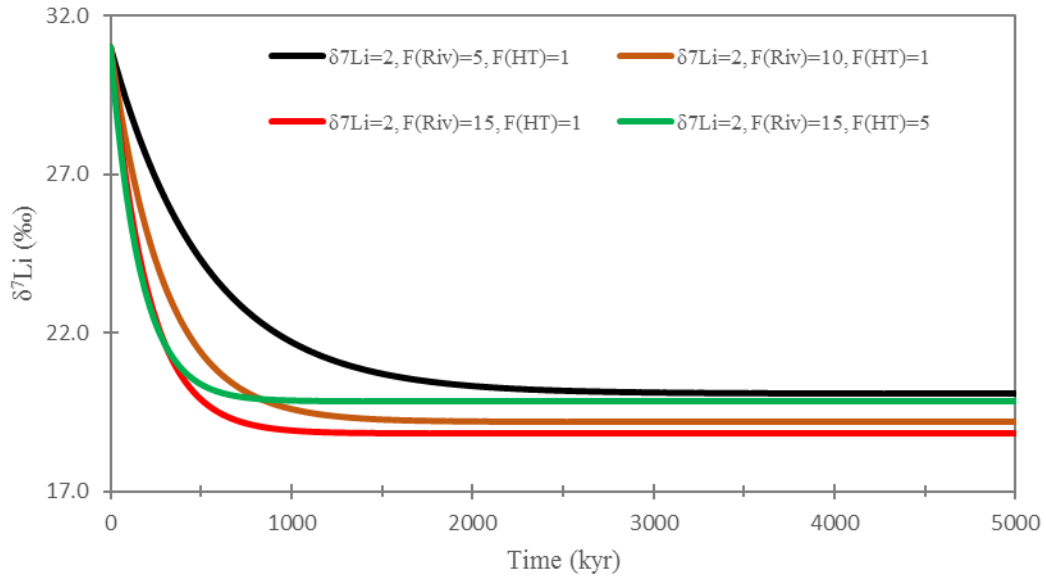

**Figure S14.** Seawater  $\delta^7\text{Li}$  response to combination of increased riverine flux (with low  $\delta^7\text{Li}_{\text{Riv}} = +2\text{‰}$ ) and hydrothermal flux (with  $\delta^7\text{Li}_{\text{HT}} = +8\text{‰}$ ), steady state model.

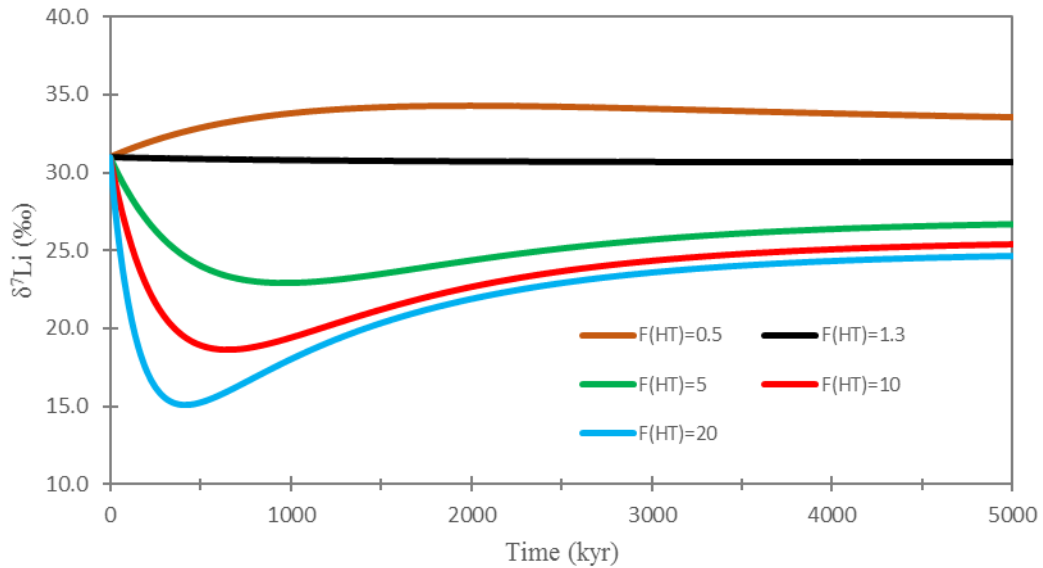

**Figure S15.** Dynamic model results of increase hydrothermal flux from  $0.5 \times$  to  $20 \times 10^{10}$  mole/year for 5 Myr. Riverine [Li] flux and Li isotopic composition are set to present-day values.



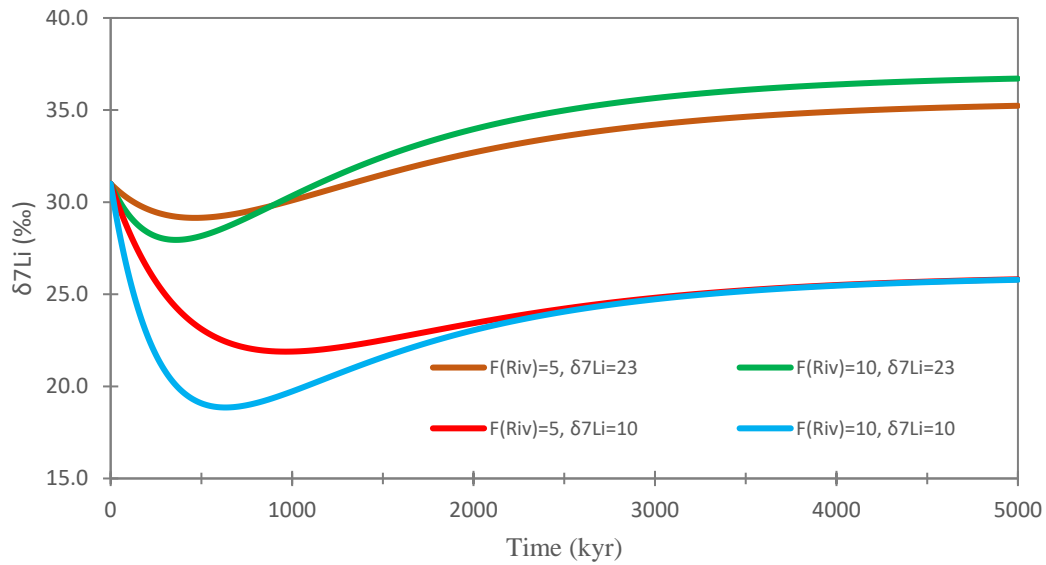

**Figure S16.** Response of seawater  $\delta^7\text{Li}$  to changes in the riverine flux and isotope ratio, dynamic model.

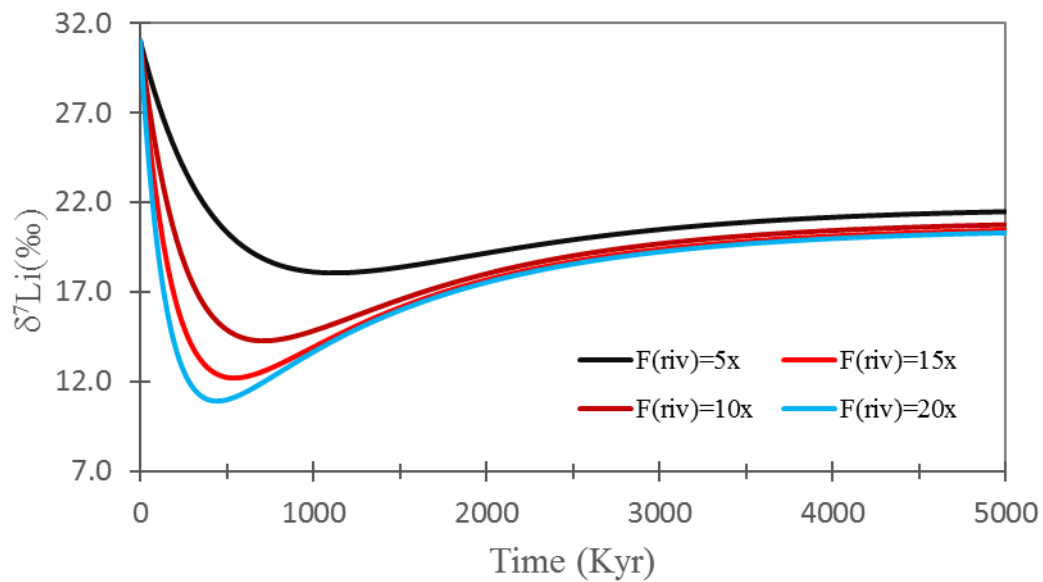

**Figure S17.** Response of seawater  $\delta^7\text{Li}$  to changes in the riverine flux with a fixed  $\delta^7\text{Li}_{\text{Riv}} = +4\%$ , dynamic model. The results indicate the Li flux would have to increase  $\sim 15\text{-}20\times$  to cause the observed seawater  $\delta^7\text{Li}$  (+10-+16‰) at PTB.

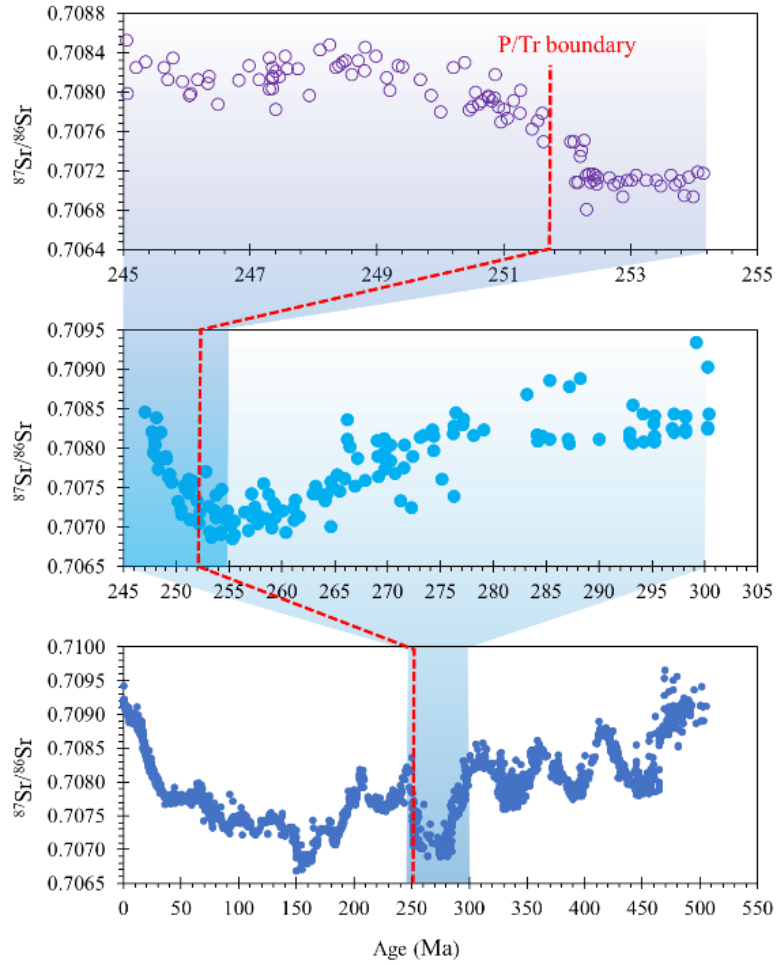

**Figure S18.** Seawater  $^{87}\text{Sr}/^{86}\text{Sr}$  evolution trend across Permian/Triassic boundary at different time scales, data from Ref (51-53)

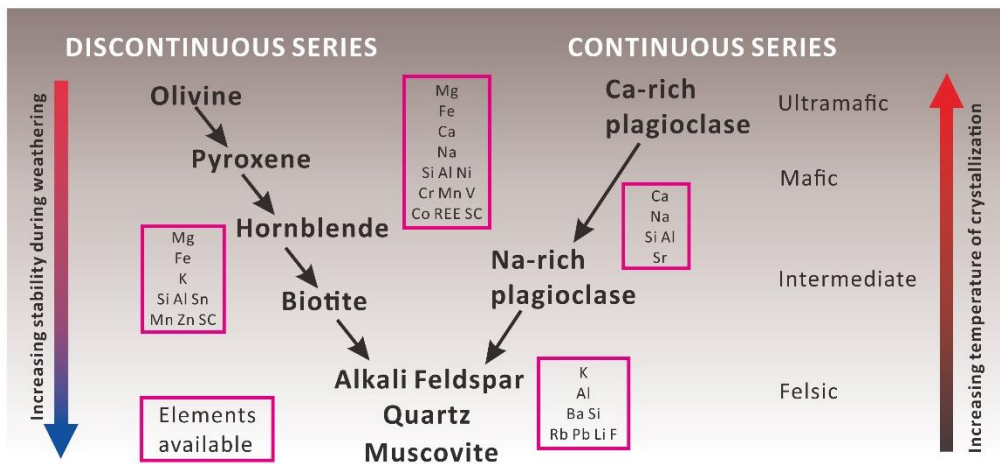

**Figure S19.** Silicate mineral stability during weathering. Decreasing temperature of crystallization results in increased stability during weathering. Revised after Ref (61).

### III. SI Tables (S1-S3)

**Table S1.** Lithium isotope and [Li] data of the Meishan section, also shown the estimated seawater Li isotope compositions. The analysis precision for Li isotopic compositions are <0.5‰ (2SD). We adopt an estimated error of ~2‰ (±1‰) for the calculated seawater  $\delta^7\text{Li}$  values.

| Formation | Sample Name | Rock type             | Height | CaO   | Li   | $\delta^7\text{Li}$ | $\delta^7\text{Li}_{\text{carb}}$ | Fclay-Ca | Fclay-1/Li | Calculated [Li] | $\delta^7\text{Li}_{\text{clays}}$ | Seawater $\delta^7\text{Li}$ | Seawater $\delta^7\text{Li}$ | Seawater $\delta^7\text{Li}$ |
|-----------|-------------|-----------------------|--------|-------|------|---------------------|-----------------------------------|----------|------------|-----------------|------------------------------------|------------------------------|------------------------------|------------------------------|
|           |             |                       | m      | wt.%  | ppm  | ‰                   | ‰                                 |          |            | of clay ppm     | ‰                                  | from clays ‰                 | from carbonate ‰             | ‰                            |
| Yinkeng   | 34-15       | carbonaceous mudstone | 12.63  | 5.84  | 37.6 | 1.2                 | -                                 | 0.84     | 0.83       | 42.6            | 1.2                                | 17.2                         | 15-17                        | 17.2                         |
| Yinkeng   | 34-14       | carbonaceous mudstone | 12.10  | 6.05  | 38.4 | 1.3                 | -                                 | 0.83     | 0.84       | 43.6            | 1.1                                | 17.1                         | 15-17                        | 17.1                         |
| Yinkeng   | 34-13       | carbonaceous mudstone | 11.58  | 5.31  | 38.6 | 1.2                 | -                                 | 0.85     | 0.84       | 43.3            | 1.1                                | 17.1                         | 15-17                        | 17.1                         |
| Yinkeng   | 34-12       | carbonaceous mudstone | 11.05  | 5.18  | 40.3 | 1.2                 | -                                 | 0.85     | 0.86       | 45.0            | 1.0                                | 17.0                         | 15-17                        | 17.0                         |
| Yinkeng   | 34-11       | claystone             | 10.52  | 1.97  | 25.1 | -0.1                | -                                 | -        | -          | -               | -                                  | 15.9                         | -                            | 15.9                         |
| Yinkeng   | 34-10       | carbonaceous mudstone | 10.47  | 5.78  | 38.0 | 1.3                 | -                                 | 0.84     | 0.84       | 43.1            | 1.1                                | 17.1                         | 15-17                        | 17.1                         |
| Yinkeng   | 34-9        | carbonaceous mudstone | 9.94   | 5.71  | 39.1 | 1.3                 | -                                 | 0.84     | 0.85       | 44.1            | 1.0                                | 17.0                         | 15-17                        | 17.0                         |
| Yinkeng   | 34-8        | carbonaceous mudstone | 9.41   | 6.51  | 34.6 | 1.0                 | -                                 | 0.82     | 0.80       | 39.9            | 1.4                                | 17.4                         | 15-17                        | 17.4                         |
| Yinkeng   | 34-6        | carbonaceous mudstone | 8.88   | 4.61  | 44.0 | 1.2                 | -                                 | 0.87     | 0.89       | 48.3            | 0.7                                | 16.7                         | 15-17                        | 16.7                         |
| Yinkeng   | 34-5        | carbonaceous mudstone | 8.35   | 6.41  | 38.2 | 2.2                 | -                                 | 0.82     | 0.84       | 43.5            | 1.1                                | 17.1                         | 15-17                        | 17.1                         |
| Yinkeng   | 34-4        | carbonaceous mudstone | 7.86   | 5.83  | 34.9 | 2.0                 | -                                 | 0.84     | 0.80       | 39.9            | 1.5                                | 17.5                         | 15-17                        | 17.5                         |
| Yinkeng   | 34-3        | carbonaceous mudstone | 7.37   | 8.23  | 34.3 | 2.2                 | -                                 | 0.77     | 0.80       | 40.5            | 1.4                                | 17.4                         | 15-17                        | 17.4                         |
| Yinkeng   | 34-2        | carbonaceous mudstone | 6.99   | 4.33  | 41.2 | 1.9                 | -                                 | 0.88     | 0.87       | 45.4            | 0.9                                | 16.9                         | 15-17                        | 16.9                         |
| Yinkeng   | 34-1        | carbonaceous mudstone | 6.49   | 2.98  | 49.4 | 1.4                 | -                                 | 0.92     | 0.93       | 52.6            | 0.4                                | 16.4                         | 15-17                        | 16.4                         |
| Yinkeng   | 33          | claystone             | 6.04   | 0.95  | 27.5 | -0.3                | -                                 | -        | -          | -               | -                                  | 15.7                         | -                            | 15.7                         |
| Yinkeng   | 32-4        | carbonaceous mudstone | 5.81   | 5.50  | 39.5 | 2.1                 | -                                 | 0.85     | 0.85       | 44.4            | 1.0                                | 17.0                         | 15-17                        | 17.0                         |
| Yinkeng   | 32-3        | carbonaceous mudstone | 5.67   | 6.89  | 36.7 | 2.1                 | -                                 | 0.81     | 0.83       | 42.3            | 1.2                                | 17.2                         | 15-17                        | 17.2                         |
| Yinkeng   | 32-2        | carbonaceous mudstone | 5.53   | 7.44  | 32.7 | 2.4                 | -                                 | 0.79     | 0.78       | 38.4            | 1.6                                | 17.6                         | 15-17                        | 17.6                         |
| Yinkeng   | 32-1        | carbonaceous mudstone | 5.39   | 10.25 | 28.7 | 2.7                 | -                                 | 0.71     | 0.71       | 35.5            | 2.0                                | 18.0                         | 15-17                        | 18.0                         |
| Yinkeng   | 31-2        | claystone             | 5.33   | 1.51  | 30.3 | -0.3                | -                                 | -        | -          | -               | -                                  | 15.7                         | -                            | 15.7                         |
| Yinkeng   | 31-1        | claystone             | 5.25   | 1.11  | 25.7 | -0.2                | -                                 | -        | -          | -               | -                                  | 15.8                         | -                            | 15.8                         |
| Yinkeng   | 30-4        | carbonaceous mudstone | 5.18   | 3.09  | 40.5 | 2.1                 | -                                 | 0.91     | 0.86       | 44.1            | 1.0                                | 17.0                         | 15-17                        | 17.0                         |
| Yinkeng   | 30-3        | carbonaceous mudstone | 5.00   | 13.65 | 20.4 | 4.4                 | -                                 | 0.62     | 0.50       | 26.9            | 3.5                                | 19.5                         | 15-17                        | 19.5                         |
| Yinkeng   | 30-2        | carbonaceous mudstone | 4.82   | 11.35 | 24.6 | 3.7                 | -                                 | 0.68     | 0.63       | 31.2            | 2.6                                | 18.6                         | 15-17                        | 18.6                         |
| Yinkeng   | 30-1        | carbonaceous mudstone | 4.74   | 8.32  | 29.5 | 2.8                 | -                                 | 0.77     | 0.73       | 35.5            | 2.0                                | 18.0                         | 15-17                        | 18.0                         |
| Yinkeng   | 30-1        | carbonaceous mudstone | 4.71   | 14.17 | 24.8 | 4.6                 | -                                 | 0.60     | 0.63       | 32.7            | 2.4                                | 18.4                         | 15-17                        | 18.4                         |
| Yinkeng   | 29-1        | carbonaceous mudstone | 4.42   | 20.57 | 18.0 | 6.8                 | -                                 | 0.42     | 0.41       | 26.5            | 3.6                                | 19.6                         | 15-17                        | 19.6                         |
| Yinkeng   | 27-C(D)     | carbonaceous mudstone | 4.22   | 29.14 | 15.3 | 9.3                 | -                                 | 0.18     | 0.27       | 27.0            | 3.5                                | 19.5                         | 15-17                        | 19.5                         |

Table S1 continued

| Formation  | Sample Name | Rock type             | Height | CaO   | Li   | $\delta^7\text{Li}$ | $\delta^7\text{Li}_{\text{carb}}$ | F <sub>clay-Ca</sub> | F <sub>clay-Li</sub> | Calculated [Li] | $\delta^7\text{Li}_{\text{clays}}$ | Seawater $\delta^7\text{Li}$ | Seawater $\delta^7\text{Li}$ | Seawater $\delta^7\text{Li}$ |
|------------|-------------|-----------------------|--------|-------|------|---------------------|-----------------------------------|----------------------|----------------------|-----------------|------------------------------------|------------------------------|------------------------------|------------------------------|
|            |             |                       | m      | wt. % | ppm  | ‰                   | ‰                                 |                      |                      | of clay ppm     | ‰                                  | from clays ‰                 | from carbonate ‰             | ‰                            |
| Yinkeng    | 26          | argillaceous mudstone | 4.11   | 5.13  | 37.6 | 0.8                 | -                                 | 0.86                 | 0.83                 | 42.3            | 1.2                                | 16.8                         | 15-17                        | 16.8                         |
| Yinkeng    | 25-26-3A    | claystone             | 4.09   | 1.10  | 30.2 | -0.2                | -                                 | -                    | -                    | -               | -                                  | -                            | 15.8                         | 15.8                         |
| Yinkeng    | 25-26-1A    | claystone             | 4.08   | 1.51  | 29.0 | 1.0                 | -                                 | -                    | -                    | -               | -                                  | -                            | 17.0                         | 17.0                         |
| Yinkeng    | 25-2A       | claystone             | 4.07   | 0.91  | 39.2 | 0.3                 | -                                 | -                    | -                    | -               | -                                  | -                            | 16.3                         | 16.3                         |
| Changhsing | 24E3-25     | chert limestone       | 4.00   | 17.54 | 17.6 | 12.4                | -                                 | -                    | -                    | -               | -                                  | -                            | 16.0                         | 16.0                         |
| Changhsing | 24-E1       | chert limestone       | 3.97   | 48.11 | 2.1  | 6.9                 | -                                 | -                    | -                    | -               | -                                  | -                            | 10.9                         | 10.9                         |
| Changhsing | 24-D6       | chert limestone       | 3.73   | 48.69 | 1.6  | 9.0                 | 1.9                               | -                    | -                    | -               | -                                  | -                            | 13.0                         | 13.0                         |
| Changhsing | 24D2-B      | chert limestone       | 3.57   | 47.96 | 4.1  | 7.8                 | 2.6                               | -                    | -                    | -               | -                                  | -                            | 11.8                         | 11.8                         |
| Changhsing | 24-B        | chert limestone       | 3.31   | 44.43 | 2.1  | 12.4                | 11.0                              | -                    | -                    | -               | -                                  | -                            | 16.4                         | 16.4                         |
| Changhsing | 23-9        | chert limestone       | 3.10   | 46.14 | 5.9  | 7.8                 |                                   | -                    | -                    | -               | -                                  | -                            | 11.8                         | 11.8                         |
| Changhsing | 23-7-B      | chert limestone       | 2.89   | 44.33 | 6.3  | 8.0                 | 10.0                              | -                    | -                    | -               | -                                  | -                            | 12.0                         | 12.0                         |
| Changhsing | 23-5        | chert limestone       | 2.67   | 38.01 | 10.7 | 6.7                 |                                   | -                    | -                    | -               | -                                  | -                            | 10.7                         | 10.7                         |
| Changhsing | 23-4-down   | chert limestone       | 2.48   | 33.78 | 14.1 | 11.2                | 11.2                              | -                    | -                    | -               | -                                  | -                            | 15.2                         | 15.2                         |
| Changhsing | 23-2-middle | chert limestone       | 2.23   | 51.18 | 2.7  | 6.8                 |                                   | -                    | -                    | -               | -                                  | -                            | 10.8                         | 10.8                         |
| Changhsing | 23-1-up-C   | chert limestone       | 1.98   | 50.89 | 1.9  | 5.9                 | 11.1                              | -                    | -                    | -               | -                                  | -                            | 9.9                          | 9.9                          |
| Changhsing | 23-1-down   | chert limestone       | 1.92   | 49.35 | 3.6  | 6.9                 | 11.4                              | -                    | -                    | -               | -                                  | -                            | 10.9                         | 10.9                         |
| Changhsing | 22-16       | chert limestone       | 1.81   | 51.62 | 1.6  | 6.6                 |                                   | -                    | -                    | -               | -                                  | -                            | 10.6                         | 10.6                         |
| Changhsing | 22-14       | chert limestone       | 1.55   | 41.92 | 8.7  | 6.3                 | 8.3                               | -                    | -                    | -               | -                                  | -                            | 10.3                         | 10.3                         |
| Changhsing | 22-12-13-C  | chert limestone       | 1.46   | 51.48 | 1.1  | 11.2                |                                   | -                    | -                    | -               | -                                  | -                            | 15.2                         | 15.2                         |
| Changhsing | 22-11       | chert limestone       | 0.62   | 49.83 | 4.7  | 8.5                 | 12.0                              | -                    | -                    | -               | -                                  | -                            | 12.5                         | 12.5                         |
| Changhsing | 22-1-B      | chert limestone       | 0.00   | 33.85 | 6.2  | 16.8                | 14.9                              | -                    | -                    | -               | -                                  | -                            | 20.8                         | 20.8                         |

F<sub>clay-Ca</sub> represent calculated fraction of clays in the studied argillaceous mudstone using diagram of CaO- $\delta^7\text{Li}$ , where  $F_{\text{clay-Ca}}=1-[\text{CaO}]/35.5$ .

F<sub>clay-Li</sub> represent calculated fraction of clays in the studied argillaceous mudstone using diagram of 1/[Li]- $\delta^7\text{Li}$ , where  $F_{\text{clay-Li}}=(1/12-1/[\text{Li}]_{\text{sample}})/(1/12-1/65)$

Calculated [Li] of clays are based on the equation of  $[\text{Li}]_{\text{clay endmember}}=(12/([\text{Li}]_{\text{sample}}-12))/F_{\text{clay-Li}}+12$

$\delta^7\text{Li}_{\text{clays}}$  is calculated Li isotopic compositions of clay endmember for each sample using 1/[Li]- $\delta^7\text{Li}$  diagram.,  $\delta^7\text{Li}_{\text{clays}}=171.5/[\text{Li}]_{\text{clay endmember}}-2.8475$

Seawater  $\delta^7\text{Li}$  calculated from clays using  $\Delta^7\text{Li}_{\text{SW-clays}}\sim +16\text{‰}$  and the calculated Li isotopic compositions of clay endmember for each sample.

Seawater  $\delta^7\text{Li}$  calculated from carbonate using  $\Delta^7\text{Li}_{\text{SW-carb}}\sim +3-5\text{‰}$  and the calculated Li isotopic compositions of carbonate endmember of  $\sim 11.5\text{‰}$  for samples from Beds 26-34 and the measured Li isotopic compositions of limestones for samples from Beds 22-24

**Table S2.** Major and trace element concentrations in samples from the Meishan section

| Sample Name | Al <sub>2</sub> O <sub>3</sub> | Fe <sub>2</sub> O <sub>3</sub> | CaO   | MgO  | Na <sub>2</sub> O | K <sub>2</sub> O | TiO <sub>2</sub> | MnO  | P <sub>2</sub> O <sub>5</sub> | Li   | B                           | Sc   | V    | Cr   | Co   | Ni   | Cu   | Zn   | Ga   | Rb   | Sr   |
|-------------|--------------------------------|--------------------------------|-------|------|-------------------|------------------|------------------|------|-------------------------------|------|-----------------------------|------|------|------|------|------|------|------|------|------|------|
|             | <i>wt.%</i>                    |                                |       |      |                   |                  |                  |      |                               |      | <i>trace element in ppm</i> |      |      |      |      |      |      |      |      |      |      |
| 30-4        | 13.16                          | 7.14                           | 3.09  | 2.65 | 0.16              | 4.81             | 0.53             | 0.03 | 0.35                          | 40.5 | 57.9                        | 12.4 | 111  | 60.3 | 12.5 | 32.1 | 33.7 | 15.6 | 19.9 | 125  | 144  |
| 30-1        | 7.74                           | 6.00                           | 14.17 | 7.26 | 0.09              | 2.74             | 0.34             | 0.08 | 0.18                          | 24.8 | 18.9                        | 7.66 | 50.5 | 33.7 | 6.80 | 17.2 | 18.1 | 14.4 | 10.7 | 74.6 | 206  |
| 29-1        | 5.02                           | 5.11                           | 20.57 | 8.73 | 0.07              | 1.72             | 0.21             | 0.09 | 0.15                          | 18.0 | 19.7                        | 5.80 | 29.9 | 20.8 | 5.55 | 12.9 | 15.5 | 11.6 | 7.11 | 47.4 | 252  |
| 27-C(D)     | 3.30                           | 2.98                           | 29.14 | 5.18 | 0.06              | 1.10             | 0.15             | 0.07 | 0.11                          | 15.3 | 17.1                        | 4.01 | 21.3 | 15.6 | 2.98 | 10.5 | 7.02 | 10.7 | 5.14 | 32.7 | 239  |
| 26          | 12.10                          | 7.02                           | 5.13  | 2.54 | 0.15              | 4.40             | 0.49             | 0.02 | 0.22                          | 37.6 | 50.4                        | 12.7 | 147  | 68.9 | 17.2 | 53.9 | 34.5 | 18.1 | 19.9 | 133  | 172  |
| 25-26-3A    | 18.18                          | 4.98                           | 1.10  | 2.93 | 0.05              | 5.97             | 0.31             | 0.00 | 0.25                          | 30.2 | 168                         | 14.3 | 39.4 | 14.2 | 3.58 | 15.9 | 16.0 | 11.9 | 25.9 | 115  | 112  |
| 25-26-1A    | 18.54                          | 5.86                           | 1.51  | 2.71 | 0.06              | 5.58             | 0.35             | 0.01 | 0.23                          | 29.0 | 170                         | 15.0 | 50.8 | 21.4 | 4.68 | 21.7 | 20.4 | 16.3 | 26.0 | 115  | 119  |
| 25-2A       | 20.13                          | 3.39                           | 0.91  | 2.96 | 0.04              | 5.41             | 0.33             | 0.01 | 0.21                          | 39.2 | 177                         | 14.8 | 11.8 | 1.79 | 1.50 | 4.49 | 8.06 | 13.6 | 29.2 | 130  | 143  |
| 24e3-25     | 3.20                           | 19.08                          | 17.54 | 0.69 | 0.04              | 0.86             | 0.12             | 0.05 | 0.15                          | 17.6 | 6.91                        | 2.88 | 16.5 | 19.7 | 2.59 | 16.2 | 22.1 | 19.3 | 4.96 | 19.6 | 213  |
| 24 (e1)     | 0.27                           | 0.76                           | 48.11 | 0.90 | 0.02              | 0.08             | 0.01             | 0.04 | 0.10                          | 2.10 | 5.58                        | 0.42 | 6.15 | 4.74 | 0.58 | 10.7 | 2.82 | 18.1 | 0.58 | 2.15 | 545  |
| 24-D6       | 0.14                           | 0.46                           | 48.69 | 0.69 | 0.02              | 0.04             | 0.01             | 0.02 | 0.38                          | 1.56 | 4.26                        | 0.26 | 5.36 | 2.66 | 0.50 | 9.73 | 1.62 | 13.5 | 0.29 | 1.25 | 1151 |
| 24D2-B      | 0.45                           | 0.69                           | 47.96 | 1.04 | 0.02              | 0.15             | 0.02             | 0.01 | 0.07                          | 4.10 | 5.43                        | 0.57 | 11.3 | 7.13 | 0.85 | 12.6 | 3.29 | 13.4 | 0.74 | 4.93 | 544  |
| 24-B        | 0.19                           | 0.57                           | 44.43 | 0.81 | 0.02              | 0.06             | 0.01             | 0.01 | 0.09                          | 2.10 | 4.77                        | 0.34 | 8.62 | 5.92 | 0.42 | 10.2 | 2.77 | 10.3 | 0.29 | 1.79 | 788  |
| 23-9        | 0.79                           | 0.94                           | 46.14 | 1.18 | 0.03              | 0.26             | 0.03             | 0.01 | 0.22                          | 5.94 | 7.95                        | 1.11 | 21.3 | 12.9 | 1.39 | 16.1 | 8.03 | 10.4 | 1.29 | 9.16 | 769  |
| 23-7-B      | 0.87                           | 1.03                           | 44.33 | 0.87 | 0.03              | 0.30             | 0.04             | 0.01 | 0.28                          | 6.35 | 10.7                        | 1.22 | 15.7 | 17.1 | 1.45 | 17.0 | 8.62 | 10.1 | 1.41 | 10.3 | 612  |
| 23-5        | 1.73                           | 1.18                           | 38.01 | 0.91 | 0.04              | 0.55             | 0.03             | 0.01 | 0.39                          | 10.7 | 9.48                        | 1.90 | 49.3 | 34.6 | 1.80 | 26.1 | 22.0 | 12.9 | 2.58 | 17.9 | 632  |
| 23-4-down   | 1.55                           | 1.04                           | 33.78 | 0.58 | 0.05              | 0.45             | 0.01             | 0.01 | 1.16                          | 14.1 | 14.3                        | 2.17 | 17.9 | 26.6 | 0.78 | 17.3 | 19.6 | 11.7 | 2.43 | 12.8 | 507  |
| 23-2-middle | 0.22                           | 0.55                           | 51.18 | 1.18 | 0.03              | 0.08             | 0.01             | 0.01 | 0.49                          | 2.68 | 5.23                        | 0.49 | 10.8 | 4.82 | 0.64 | 11.3 | 3.89 | 10.6 | 0.45 | 2.73 | 793  |
| 23-1-up-C   | 0.21                           | 0.49                           | 50.89 | 1.08 | 0.03              | 0.07             | 0.01             | 0.01 | 0.44                          | 1.90 | 4.84                        | 0.35 | 6.87 | 4.17 | 0.62 | 10.7 | 2.92 | 10.1 | 0.39 | 2.38 | 931  |
| 23-1-down   | 0.56                           | 0.68                           | 49.35 | 1.02 | 0.03              | 0.16             | 0.01             | 0.01 | 0.68                          | 3.65 | 7.00                        | 1.01 | 10.2 | 6.51 | 1.87 | 12.9 | 5.49 | 10.2 | 0.70 | 5.15 | 754  |
| 22-16       | 0.13                           | 0.45                           | 51.62 | 1.04 | 0.03              | 0.04             | 0.00             | 0.01 | 0.85                          | 1.64 | 4.84                        | 0.42 | 4.27 | 3.64 | 0.52 | 10.6 | 2.85 | 9.11 | 0.23 | 1.23 | 811  |
| 22-14       | 1.52                           | 0.92                           | 41.92 | 0.94 | 0.06              | 0.46             | 0.00             | 0.01 | 3.45                          | 8.70 | 19.5                        | 1.65 | 23.3 | 20.9 | 1.85 | 18.1 | 19.9 | 10.4 | 1.98 | 13.6 | 742  |
| 22-12-13-C  | 0.09                           | 0.44                           | 51.48 | 0.79 | 0.03              | 0.03             | 0.01             | 0.01 | 1.12                          | 1.09 | 4.88                        | 0.22 | 6.76 | 1.96 | 0.50 | 10.2 | 1.44 | 10.3 | 0.18 | 0.96 | 876  |
| 22-11       | 0.52                           | 0.66                           | 49.83 | 0.77 | 0.03              | 0.16             | 0.02             | 0.01 | 0.14                          | 4.65 | 6.10                        | 0.56 | 7.13 | 3.86 | 0.60 | 9.65 | 4.07 | 7.16 | 0.74 | 5.73 | 1040 |
| 22-1-B      | 0.68                           | 0.73                           | 33.85 | 0.61 | 0.04              | 0.18             | 0.03             | 0.01 | 0.22                          | 6.19 | 9.47                        | 0.77 | 10.0 | 6.68 | 1.05 | 10.7 | 4.83 | 10.6 | 1.20 | 7.48 | 469  |

Table S2 continued

| Sample Name | Y                           | Zr   | Nb   | Ba   | La   | Ce   | Pr   | Nd   | Sm   | Eu   | Gd   | Tb   | Dy   | Ho   | Er   | Tm   | Yb   | Lu   | Hf   | Pb   | Th   | U    |
|-------------|-----------------------------|------|------|------|------|------|------|------|------|------|------|------|------|------|------|------|------|------|------|------|------|------|
|             | <i>trace element in ppm</i> |      |      |      |      |      |      |      |      |      |      |      |      |      |      |      |      |      |      |      |      |      |
| 30-4        | 22.5                        | 120  | 20.9 | 272  | 38.5 | 73.1 | 8.50 | 30.3 | 5.80 | 0.90 | 5.33 | 0.86 | 4.63 | 0.96 | 2.78 | 0.44 | 2.90 | 0.45 | 3.76 | 27.4 | 12.9 | 7.28 |
| 30-1        | 19.1                        | 78.1 | 9.85 | 158  | 26.5 | 50.3 | 6.28 | 22.7 | 4.43 | 0.83 | 4.32 | 0.68 | 3.53 | 0.72 | 1.93 | 0.28 | 1.74 | 0.26 | 2.37 | 11.1 | 8.96 | 2.15 |
| 29-1        | 21.9                        | 51.3 | 6.29 | 97.4 | 24.1 | 42.4 | 5.79 | 21.5 | 4.31 | 0.82 | 4.36 | 0.68 | 3.50 | 0.72 | 1.92 | 0.27 | 1.67 | 0.26 | 1.49 | 9.69 | 5.66 | 1.52 |
| 27-C(D)     | 29.9                        | 35.8 | 4.55 | 135  | 27.9 | 43.1 | 6.16 | 23.3 | 4.73 | 0.89 | 5.08 | 0.80 | 4.29 | 0.92 | 2.58 | 0.36 | 2.19 | 0.33 | 1.09 | 7.54 | 4.12 | 1.76 |
| 26          | 20.0                        | 115  | 15.1 | 254  | 39.4 | 67.8 | 8.12 | 29.2 | 5.44 | 0.90 | 5.04 | 0.77 | 4.07 | 0.83 | 2.37 | 0.37 | 2.44 | 0.37 | 3.56 | 43.8 | 15.5 | 6.86 |
| 25-26-3A    | 32.7                        | 286  | 18.7 | 44.3 | 43.0 | 99.5 | 11.9 | 43.5 | 8.28 | 0.98 | 7.66 | 1.31 | 7.34 | 1.50 | 4.10 | 0.59 | 3.55 | 0.51 | 10.7 | 47.4 | 47.0 | 7.35 |
| 25-26-1A    | 32.2                        | 274  | 19.1 | 66.2 | 48.4 | 110  | 13.1 | 47.5 | 8.81 | 1.05 | 7.92 | 1.30 | 7.12 | 1.44 | 3.91 | 0.56 | 3.40 | 0.49 | 9.81 | 56.6 | 42.9 | 7.68 |
| 25-2A       | 38.1                        | 340  | 24.0 | 20.6 | 47.2 | 111  | 13.3 | 47.8 | 9.32 | 1.08 | 8.64 | 1.51 | 8.44 | 1.68 | 4.48 | 0.62 | 3.60 | 0.51 | 12.1 | 41.6 | 53.5 | 7.50 |
| 24e3-25     | 23.9                        | 42.0 | 12.4 | 76.5 | 24.4 | 47.6 | 6.48 | 24.9 | 5.64 | 0.83 | 5.76 | 0.95 | 5.08 | 1.04 | 2.92 | 0.44 | 3.05 | 0.47 | 1.33 | 57.5 | 5.75 | 9.37 |
| 24 (e1)     | 21.0                        | 3.96 | 0.45 | 66.8 | 12.9 | 17.7 | 2.17 | 8.39 | 1.87 | 0.26 | 2.48 | 0.44 | 2.76 | 0.66 | 2.02 | 0.30 | 1.87 | 0.29 | 0.12 | 5.14 | 0.49 | 5.16 |
| 24-D6       | 2.55                        | 2.23 | 0.20 | 68.3 | 2.01 | 3.20 | 0.40 | 1.50 | 0.30 | 0.06 | 0.34 | 0.06 | 0.32 | 0.07 | 0.21 | 0.03 | 0.19 | 0.03 | 0.05 | 1.89 | 0.29 | 3.57 |
| 24D2-B      | 3.39                        | 6.59 | 0.70 | 10.6 | 2.40 | 4.02 | 0.50 | 1.84 | 0.39 | 0.07 | 0.43 | 0.07 | 0.42 | 0.09 | 0.28 | 0.04 | 0.26 | 0.04 | 0.16 | 4.70 | 0.65 | 2.46 |
| 24-B        | 3.15                        | 2.55 | 0.23 | 10.6 | 2.66 | 4.44 | 0.56 | 2.06 | 0.41 | 0.07 | 0.44 | 0.07 | 0.40 | 0.09 | 0.26 | 0.04 | 0.23 | 0.04 | 0.06 | 2.31 | 0.33 | 1.64 |
| 23-9        | 6.36                        | 8.46 | 0.98 | 37.6 | 6.62 | 10.6 | 1.43 | 5.34 | 1.05 | 0.20 | 1.09 | 0.17 | 0.89 | 0.19 | 0.52 | 0.07 | 0.44 | 0.07 | 0.24 | 3.79 | 1.18 | 4.68 |
| 23-7-B      | 5.59                        | 9.08 | 1.13 | 18.1 | 5.60 | 10.3 | 1.27 | 4.77 | 0.96 | 0.18 | 0.99 | 0.15 | 0.83 | 0.17 | 0.48 | 0.07 | 0.43 | 0.06 | 0.25 | 4.45 | 1.51 | 3.16 |
| 23-5        | 7.16                        | 18.4 | 1.11 | 34.6 | 6.10 | 9.86 | 1.41 | 5.32 | 1.15 | 0.23 | 1.20 | 0.19 | 1.05 | 0.22 | 0.63 | 0.09 | 0.59 | 0.09 | 0.45 | 5.76 | 2.41 | 5.73 |
| 23-4-down   | 14.4                        | 17.7 | 0.57 | 22.5 | 10.2 | 16.2 | 2.46 | 9.42 | 2.20 | 0.38 | 2.46 | 0.42 | 2.40 | 0.49 | 1.38 | 0.19 | 1.21 | 0.18 | 0.38 | 6.46 | 2.95 | 4.31 |
| 23-2-middle | 4.09                        | 3.98 | 0.35 | 4.78 | 3.35 | 4.81 | 0.67 | 2.56 | 0.55 | 0.11 | 0.62 | 0.10 | 0.56 | 0.12 | 0.34 | 0.05 | 0.29 | 0.04 | 0.11 | 0.74 | 0.58 | 3.02 |
| 23-1-up-C   | 2.01                        | 2.70 | 0.31 | 4.49 | 1.71 | 2.72 | 0.36 | 1.34 | 0.28 | 0.06 | 0.31 | 0.05 | 0.27 | 0.06 | 0.16 | 0.02 | 0.14 | 0.02 | 0.07 | 0.52 | 0.42 | 2.02 |
| 23-1-down   | 6.15                        | 5.36 | 0.49 | 6.55 | 5.55 | 8.10 | 1.04 | 3.77 | 0.78 | 0.15 | 0.87 | 0.14 | 0.81 | 0.17 | 0.51 | 0.08 | 0.51 | 0.08 | 0.16 | 1.68 | 1.01 | 3.82 |
| 22-16       | 3.90                        | 1.69 | 0.18 | 3.16 | 2.45 | 3.23 | 0.49 | 1.94 | 0.44 | 0.10 | 0.53 | 0.09 | 0.50 | 0.11 | 0.30 | 0.04 | 0.26 | 0.04 | 0.04 | 0.41 | 0.34 | 3.15 |
| 22-14       | 14.8                        | 19.9 | 0.22 | 23.6 | 10.4 | 15.4 | 2.51 | 10.0 | 2.30 | 0.43 | 2.56 | 0.42 | 2.31 | 0.47 | 1.28 | 0.17 | 1.10 | 0.17 | 0.54 | 4.79 | 3.42 | 10.8 |
| 22-12-13-C  | 2.02                        | 1.56 | 0.15 | 2.45 | 1.68 | 2.82 | 0.34 | 1.30 | 0.28 | 0.05 | 0.32 | 0.05 | 0.28 | 0.06 | 0.16 | 0.02 | 0.13 | 0.02 | 0.04 | 0.44 | 0.31 | 3.00 |
| 22-11       | 2.42                        | 6.08 | 0.78 | 8.37 | 3.30 | 5.84 | 0.69 | 2.46 | 0.46 | 0.08 | 0.46 | 0.07 | 0.36 | 0.07 | 0.21 | 0.03 | 0.20 | 0.03 | 0.17 | 1.32 | 1.17 | 1.43 |
| 22-1-B      | 5.65                        | 7.88 | 1.60 | 15.5 | 4.19 | 7.46 | 0.83 | 3.07 | 0.65 | 0.11 | 0.73 | 0.12 | 0.73 | 0.16 | 0.47 | 0.07 | 0.42 | 0.06 | 0.19 | 2.42 | 0.96 | 2.99 |

**Table S3** Input parameters for seawater Li isotope modeling

| Run parameters   | Total Li <sub>SW</sub><br>10 <sup>10</sup> mole | F <sub>Riv</sub><br>10 <sup>10</sup> mole/yr | δ <sup>7</sup> Li <sub>Riv</sub><br>‰ | F <sub>HT</sub><br>10 <sup>10</sup> mole/yr | δ <sup>7</sup> Li <sub>HT</sub><br>‰ | F <sub>SR</sub><br>10 <sup>10</sup> mole/yr | δ <sup>7</sup> Li <sub>SR</sub><br>‰ | F <sub>SC</sub><br>10 <sup>10</sup> mole/yr | δ <sup>7</sup> Li <sub>SC</sub><br>‰ | δ <sup>7</sup> Li <sub>SW</sub><br>‰ |
|------------------|-------------------------------------------------|----------------------------------------------|---------------------------------------|---------------------------------------------|--------------------------------------|---------------------------------------------|--------------------------------------|---------------------------------------------|--------------------------------------|--------------------------------------|
| Start parameters | 3.4×10 <sup>6</sup>                             | 1                                            | 23                                    | 1.3                                         | 8                                    | 0.6                                         | 15                                   | 2.9                                         | 15                                   | 31                                   |
| Steady state -1  | 3.4×10 <sup>6</sup>                             | 1                                            | 2, 5, 10,<br>20                       | 1.3                                         | 8                                    | 0.6                                         | 15                                   | F <sub>input</sub>                          | 15                                   | Fig. S11                             |
| Steady state -2  | 3.4×10 <sup>6</sup>                             | 1, 5, 10,<br>15                              | 2                                     | 1.3                                         | 8                                    | 0.6                                         | 15                                   | F <sub>input</sub>                          | 15                                   | Fig. S12                             |
| Steady state -3  | 3.4×10 <sup>6</sup>                             | 1                                            | 23                                    | 0.5, 1.3, 5,<br>10, 20                      | 8                                    | 0.6                                         | 15                                   | F <sub>input</sub>                          | 15                                   | Fig. S13                             |
| Steady state -4  | 3.4×10 <sup>6</sup>                             | 5, 10, 15                                    | 2                                     | 1, 5                                        | 8                                    | 0.6                                         | 15                                   | F <sub>input</sub>                          | 15                                   | Fig. S14                             |
| Dynamic -1       | Nt                                              | 1                                            | 23                                    | 0.5, 1.3, 5,<br>10, 20                      | 8                                    | 0.6                                         | 15                                   | kNt                                         | 15                                   | Fig. S15                             |
| Dynamic -2       | Nt                                              | 5, 10                                        | 10, 23                                | 1.3                                         | 8                                    | 0.6                                         | 15                                   | kNt                                         | 15                                   | Fig. S16                             |
| Dynamic -3       | Nt                                              | 5, 10,<br>15, 20                             | 4                                     | 1.3                                         | 8                                    | 0.6                                         | 15                                   | kNt                                         | 15                                   | Fig. S17                             |
| Dynamic          | Nt                                              | 18, to 1                                     | 4, to 23                              | 1.3                                         | 8                                    | 0.6                                         | 15                                   | kNt                                         | 15                                   | Fig.2                                |

Start parameters are modern values from ref (9). In the steady state model, F<sub>SC</sub> always equal to F<sub>input</sub>, lead to constant seawater Li reservoir ~3.4×10<sup>16</sup>mole. In the dynamic model, as described in supplementary text, F<sub>SC</sub> is a function of seawater Li concentration, thus forming a feedback system on seawater Li reservoir and Li input fluxes. Detailed modeling parameters for Fig.2 in the main text are also listed in the table. The F<sub>Riv</sub> was initially set at high levels of ~18 times of present values for 300Kyr, and then changed to 1×10<sup>10</sup>mole/yr for 400Kyr. The δ<sup>7</sup>Li<sub>Riv</sub> was initially set at light values of ~4‰ for 300Kyr, and then changed to 23‰ for another 400Kyr.

#### IV. Supplemental References

1. Huh Y, Chan LH, Chadwick OA (2004) Behavior of lithium and its isotopes during weathering of Hawaiian basalt. *Geochem Geophys Geosy* 5(9):1-22.
2. Huh Y, Chan L-H, Edmond JM (2001) Lithium isotopes as a probe of weathering processes: Orinoco River. *Earth Planet. Sci. Lett.* 194(1):189-199.
3. Kısakürek B, James RH, Harris NB (2005) Li and  $\delta^7\text{Li}$  in Himalayan rivers: Proxies for silicate weathering? *Earth Planet. Sci. Lett.* 237(3):387-401.
4. Tomascak PB (2004) Developments in the understanding and application of lithium isotopes in the earth and planetary sciences. *Rev Mineral Geochem* 55(1):153-195.
5. Teng F-Z, *et al.* (2004) Lithium isotopic composition and concentration of the upper continental crust. *Geochim. Cosmochim. Acta* 68(20):4167-4178.
6. Wimpenny J, *et al.* (2010) The behaviour of Li and Mg isotopes during primary phase dissolution and secondary mineral formation in basalt. *Geochim. Cosmochim. Acta* 74(18):5259-5279.
7. Pogge von Strandmann PAE, *et al.* (2006) Riverine behaviour of uranium and lithium isotopes in an actively glaciated basaltic terrain. *Earth Planet. Sci. Lett.* 251(1):134-147.
8. von Strandmann PAE, Burton KW, James RH, van Calsteren P, Gislason SR (2010) Assessing the role of climate on uranium and lithium isotope behaviour in rivers draining a basaltic terrain. *Chem Geol* 270(1):227-239.
9. Misra S, Froelich PN (2012) Lithium isotope history of Cenozoic seawater: Changes in silicate weathering and reverse weathering. *Science* 335(6070):818-823.
10. Liu X-M, Rudnick RL, McDonough WF, Cummings ML (2013) Influence of chemical weathering on the composition of the continental crust: Insights from Li and Nd isotopes in bauxite profiles developed on Columbia River Basalts. *Geochim. Cosmochim. Acta* 115(0):73-91.
11. von Strandmann PAE, Jenkyns HC, Woodfine RG (2013) Lithium isotope evidence for enhanced weathering during Oceanic Anoxic Event 2. *Nat Geosci* 6(8):668-672.
12. Kump LR, Brantley SL, Arthur MA (2000) Chemical weathering, atmospheric  $\text{CO}_2$ , and climate. *Annu Rev Earth Planet Sci* 28(1):611-667.
13. Hathorne EC, James RH (2006) Temporal record of lithium in seawater: A tracer for silicate weathering? *Earth Planet. Sci. Lett.* 246(3):393-406.
14. Chan LH, Gieskes JM, You CF, Edmond JM (1994) Lithium isotope geochemistry of sediments and hydrothermal fluids of the Guaymas Basin, Gulf of California. *Geochim. Cosmochim. Acta* 58(20):4443-4454.
15. Elderfield H, Schultz A (1996) Mid-ocean ridge hydrothermal fluxes and the chemical composition of the ocean. *Annu Rev Earth Planet Sci* 24:191-224.
16. Chan LH, Edmond JM, Thompson G, Gillis K (1992) Lithium isotopic composition of submarine basalts: implications for the lithium cycle in the oceans. *Earth Planet. Sci. Lett.* 108(1):151-160.
17. Vigier N, *et al.* (2008) Quantifying Li isotope fractionation during smectite formation and implications for the Li cycle. *Geochim. Cosmochim. Acta* 72(3):780-792.
18. Jeffcoate AB, Elliott T, Thomas A, Bouman C (2004) Precise/small sample size determinations of lithium isotopic compositions of geological reference materials and modern seawater by MC - ICP - MS. *Geostand Geoanal Res* 28(1):161-172.
19. Marriott CS, Henderson GM, Belshaw NS, Tudhope AW (2004) Temperature dependence of  $\delta^7\text{Li}$ ,  $\delta^{44}\text{Ca}$  and Li/Ca during growth of calcium carbonate. *Earth Planet. Sci. Lett.* 222(2):615-624.
20. Marriott CS, Henderson GM, Crompton R, Staubwasser M, Shaw S (2004) Effect of mineralogy, salinity, and temperature on Li/Ca and Li isotope composition of calcium carbonate. *Chem Geol* 212(1):5-15.
21. Chan LH, Leeman WP, Plank T (2006) Lithium isotopic composition of marine sediments. *Geochem Geophys Geosy* 7(6):1-25.
22. Chan L-H, Alt JC, Teagle DA (2002) Lithium and lithium isotope profiles through the upper oceanic crust: a study of seawater-basalt exchange at ODP Sites 504B and 896A. *Earth Planet. Sci. Lett.* 201(1):187-201.
23. Pourmand A, Dauphas N, Ireland TJ (2012) A novel extraction chromatography and MC-ICP-MS technique for rapid analysis of REE, Sc and Y: Revising CI-chondrite and Post-Archean Australian Shale (PAAS) abundances. *Chem Geol* 291:38-54.
24. Azmy K, *et al.* (2011) Biogenic and abiogenic low-Mg calcite (bLMC and aLMC): Evaluation of



- seawater-REE composition, water masses and carbonate diagenesis. *Chem Geol* 280(1):180-190.
25. Yin H, Xie S, Luo G, Algeo TJ, Zhang K (2012) Two episodes of environmental change at the Permian–Triassic boundary of the GSSP section Meishan. *Earth-Sci. Rev.* 115(3):163-172.
  26. Michalopoulos P, Aller RC (1995) Rapid clay mineral formation in Amazon delta sediments: reverse weathering and oceanic elemental cycles. *Science*:614-614.
  27. Plank T, Langmuir CH (1998) The chemical composition of subducting sediment and its consequences for the crust and mantle. *Chem Geol* 145(3):325-394.
  28. Gao S, *et al.* (1998) Chemical composition of the continental crust as revealed by studies in East China. *Geochim. Cosmochim. Acta* 62(11):1959-1975.
  29. Zhang J, Liang H, He X, Yang Y, Chen B (2011) Sulfur isotopes of framboidal pyrite in the Permian-Triassic boundary clay at Meishan section. *Acta Geologica Sinica - English Edition* 85(3):694-701.
  30. Montes CR, Melfi AJ, Carvalho A, Vieira-Coelho AC, Formoso ML (2002) Genesis, mineralogy and geochemistry of kaolin deposits of the Jari River, Amapá State, Brazil. *Clays Clay Miner* 50(4):494-503.
  31. Fernandez R, Martirena F, Scrivener KL (2011) The origin of the pozzolanic activity of calcined clay minerals: a comparison between kaolinite, illite and montmorillonite. *Cement Concrete Res* 41(1):113-122.
  32. Mermut AR, Cano AF (2001) Baseline studies of the clay minerals society source clays: chemical analyses of major elements. *Clays Clay Miner* 49(5):381-386.
  33. Elliott T, Plank T, Zindler A, White W, Bourdon B (1997) Element transport from slab to volcanic front at the Mariana arc. *J. Geophys. Res.* 102(B7):14991-15019.
  34. Maxwell JA (1963) *Geochemical study of some chert and related deposits* (Department of Mines and Technical Surveys, Canada).
  35. Hoefs J, Sywall M (1997) Lithium isotope composition of Quaternary and Tertiary biogene carbonates and a global lithium isotope balance. *Geochim. Cosmochim. Acta* 61(13):2679-2690.
  36. Gieskes JM (1981) Deep-sea drilling interstitial water studies: implications for chemical alteration of the oceanic crust, layers I and II. *The Deep Sea Drilling Project: A Decade of Progress. Spec. Publ.—Soc. Econ. Paleontol. Mineral* 32:149-167.
  37. Mirota MD, Veizer J (1994) Geochemistry of precambrian carbonates: VI. Aphebian albanel formations, Quebec, Canada. *Geochim. Cosmochim. Acta* 58(7):1735-1745.
  38. Misra S, Froelich PN (2009) Measurement of lithium isotope ratios by quadrupole-ICP-MS: application to seawater and natural carbonates. *J Anal Atom Spectrom* 24(11):1524-1533.
  39. Scholz F, *et al.* (2010) Lithium isotope geochemistry of marine pore waters—insights from cold seep fluids. *Geochim. Cosmochim. Acta* 74(12):3459-3475.
  40. Chan L-H, Kastner M (2000) Lithium isotopic compositions of pore fluids and sediments in the Costa Rica subduction zone: implications for fluid processes and sediment contribution to the arc volcanoes. *Earth Planet. Sci. Lett.* 183(1):275-290.
  41. You C-F, Chan L, Spivack A, Gieskes J (1995) Lithium, boron, and their isotopes in sediments and pore waters of Ocean Drilling Program Site 808, Nankai Trough: Implications for fluid expulsion in accretionary prisms. *Geology* 23(1):37-40.
  42. Williams LB, Hervig RL (2005) Lithium and boron isotopes in illite-smectite: the importance of crystal size. *Geochim. Cosmochim. Acta* 69(24):5705-5716.
  43. Chan LH, Edmond JM, Thompson G (1993) A lithium isotope study of hot springs and metabasalts from mid - ocean ridge hydrothermal systems. *J Geophys Res: Solid Earth* 98(B6):9653-9659.
  44. Huh Y, Chan L-H, Zhang L, Edmond JM (1998) Lithium and its isotopes in major world rivers: implications for weathering and the oceanic budget. *Geochim. Cosmochim. Acta* 62(12):2039-2051.
  45. Seyfried Jr W, Chen X, Chan L-H (1998) Trace element mobility and lithium isotope exchange during hydrothermal alteration of seafloor weathered basalt: an experimental study at 350 C, 500 bars. *Geochim. Cosmochim. Acta* 62(6):949-960.
  46. Jeffcoate A, *et al.* (2007) Li isotope fractionation in peridotites and mafic melts. *Geochim. Cosmochim. Acta* 71(1):202-218.
  47. Yin H, *et al.* (2014) The end-Permian regression in South China and its implication on mass extinction. *Earth-Sci. Rev.* 137:19–33.

48. Veevers J (2004) Gondwanaland from 650–500 Ma assembly through 320 Ma merger in Pangea to 185–100 Ma breakup: supercontinental tectonics via stratigraphy and radiometric dating. *Earth-Sci. Rev.* 68(1):1-132.
49. Erwin DH, Bowring SA, Yugan J (2002) End-Permian mass extinctions: a review. *Geol Soc Am:*363-384.
50. Korte C, Jasper T, Kozur HW, Veizer J (2006)  $^{87}\text{Sr}/^{86}\text{Sr}$  record of Permian seawater. *Palaeogeogr Palaeoclimatol Palaeoecol* 240(1):89-107.
51. Martin EE, Macdougall JD (1995) Sr and Nd isotopes at the Permian/Triassic boundary: A record of climate change. *Chem Geol* 125(1–2):73-99.
52. Prokoph A, Shields GA, Veizer J (2008) Compilation and time-series analysis of a marine carbonate  $\delta^{18}\text{O}$ ,  $\delta^{13}\text{C}$ ,  $^{87}\text{Sr}/^{86}\text{Sr}$  and  $\delta^{34}\text{S}$  database through Earth history. *Earth-Sci. Rev.* 87(3):113-133.
53. Song H, *et al.* (2015) Integrated Sr isotope variations and global environmental changes through the Late Permian to early Late Triassic. *Earth Plane Sci. Lett.* 424:140-147.
54. Burgess SD, Bowring SA (2015) High-precision geochronology confirms voluminous magmatism before, during, and after Earth's most severe extinction. *Sci Adv* 1(7):e1500470-e1500470.
55. Svensen H, *et al.* (2009) Siberian gas venting and the end-Permian environmental crisis. *Earth Planet. Sci. Lett.* 277(3):490-500.
56. Reichow MK, *et al.* (2009) The timing and extent of the eruption of the Siberian Traps large igneous province: Implications for the end-Permian environmental crisis. *Earth Planet. Sci. Lett.* 277(1):9-20.
57. Renne PR, Black MT, Zichao Z, Richards MA, Basu AR (1995) Synchrony and Causal Relations Between Permian-Triassic Boundary Crises and Siberian Flood Volcanism. *Science* 269(5229):1413-1416.
58. Schneebeli-Hermann E, *et al.* (2013) Evidence for atmospheric carbon injection during the end-Permian extinction. *Geology* 41(5):579-582.
59. Joachimski MM, *et al.* (2012) Climate warming in the latest Permian and the Permian-Triassic mass extinction. *Geology* 40(3):195-198.
60. Maruoka T, Koeberl C, Hancox P, Reimold W (2003) Sulfur geochemistry across a terrestrial Permian–Triassic boundary section in the Karoo Basin, South Africa. *Earth Planet. Sci. Lett.* 206(1):101-117.
61. Depetris PJ, Pasquini AI, Lecomte KL (2014) *Weathering and the Riverine Denudation of Continents* (Springer Netherlands).
